1 **The genetic architecture of recurrent**  
2 **segregation distortion in *Arabidopsis thaliana***

3

4 Danelle K. Seymour<sup>1</sup>, Eunyoung Chae, Burak I. Ariöz, Daniel Koenig<sup>2</sup>, Detlef Weigel

5

6 Department of Molecular Biology, Max Planck Institute for Developmental Biology,  
7 72076 Tübingen, Germany

8

9 <sup>1</sup>Current address: Department of Ecology and Evolutionary Biology, University of  
10 California, Irvine, CA, USA

11 <sup>2</sup>Current address: Department of Botany and Plant Sciences, University of California,  
12 Riverside, CA, USA

13

14

15

16

17

18

19

20

21 **Short title**

22 Segregation distortion in *A. thaliana*

23

24 **Key words**

25 Segregation distortion, *Arabidopsis thaliana*, genetic incompatibility, allele frequency

26 distortion

27

28 **Corresponding author**

29 Detlef Weigel

30 Max Planck Institute for Developmental Biology

31 Spemannstrasse 37-39

32 D-72076 Tübingen

33 Germany

34 +49-(0)7071-601 1411

35 email: [weigel@weigelworld.org](mailto:weigel@weigelworld.org)

36

## 37 **Abstract**

38 The equal probability of transmission of alleles from either parent during sexual  
39 reproduction is a central tenet of genetics and evolutionary biology. Yet, there are many  
40 cases where this rule is violated. Such violations limit intraspecific gene flow and can  
41 facilitate the formation of genetic barriers, a first step in speciation. Biased transmission  
42 of alleles, or segregation distortion, can result from a number of biological processes  
43 including epistatic interactions between incompatible loci, gametic selection, and meiotic  
44 drive. Examples of these phenomena have been identified in many species, implying  
45 that they are universal, but comprehensive species-wide studies of segregation  
46 distortion are lacking. We have performed a species-wide screen for distorted allele  
47 frequencies in over 500 segregating populations of *Arabidopsis thaliana* using reduced-  
48 representation genome sequencing. Biased transmission of alleles was evident in up to  
49 a quarter of surveyed populations. Most populations exhibited distortion at only one  
50 genomic region, with some regions being repeatedly affected in multiple populations.  
51 Our results begin to elucidate the species-level architecture of biased transmission of  
52 genetic material in *A. thaliana*, and serve as a springboard for future studies into the  
53 basis of intraspecific genetic barriers.

## 54 **Introduction**

55 At the genetic level, evolution is the change in the frequency of allelic variants over time.  
56 While in many cases the strength of selection is too low for these changes to be  
57 detected within a few generations, a unique opportunity to directly study such changes

58 is offered in cases where selection coefficients are high. In such a situation, competition  
59 between alleles can be seen already in the distribution of heterozygous progeny ( $a/A$ ). It  
60 is manifested as a deviation from the 1:2:1 Mendelian ratio of diploid genotypes ( $a/a$ ,  
61  $a/A$ ,  $A/A$ ), termed allelic or segregation distortion. Deviation from this ratio has important  
62 implications for population dynamics. Favoring inheritance of an allele from one  
63 grandparent over that from the other grandparent implies that certain genotypic  
64 combinations may be unfit (FISHMAN AND SAUNDERS 2008; PHADNIS AND ORR 2009;  
65 McDERMOTT AND NOOR 2010). Depending on the underlying mechanism, complete  
66 obstruction to the free flow of genetic information can be an irreversible step on the path  
67 towards speciation (reviewed in (PRESGRAVES 2010)).

68 Segregation distortion, which is quite commonly observed in nature, can be the  
69 result of deleterious epistatic interactions between incompatible loci, gametic selection,  
70 or meiotic drive (reviewed in (LYTTLE 1991)). Perhaps epistatic interactions of the  
71 Bateson-Dobzhansky-Muller type are the best-studied examples (ORR 1996). Alone, the  
72 mutations causal for incompatibilities in progeny are innocuous in their native genetic  
73 environment. But when combined, their reduced fitness or lethality removes  
74 incompatible genotypic combinations from the population. Examples of two-locus  
75 incompatibilities have been identified in and between several eukaryotic species  
76 (reviewed in (ORR AND PRESGRAVES 2000; BOMBLIES AND WEIGEL 2007; RIESEBERG AND  
77 WILLIS 2007)) and causal loci are frequently associated with fast molecular evolution  
78 (reviewed in (ORR AND PRESGRAVES 2000; BOMBLIES AND WEIGEL 2007)). Likely, strong  
79 epistatic incompatibilities are a common topic in the literature not only due to their role in

80 speciation, but also because they are easy to detect.

81 Far fewer examples of meiotic drive and gametic selection have been  
82 characterized. Meiotic drive refers to the preferential inheritance of one chromosome  
83 during meiosis and is most easily discovered during female gametogenesis (SANDLER *et*  
84 *al.* 1959), as only one of the four meiotic products will become the egg nucleus. This  
85 creates the opportunity for “selfish” loci to position themselves favorably so that they  
86 their transmission is favored in the next generation. Some known examples of female  
87 drive involve changes in either centromeric or other heterochromatic regions (MALIK AND  
88 HENIKOFF 2002; FISHMAN AND SAUNDERS 2008), possibly favoring transmission of the  
89 drive chromosome by increasing its affinity for the meiotic machinery (STURTEVANT AND  
90 DOBZHANSKY 1936; RHOADES 1942; SANDLER *et al.* 1959; HARTL *et al.* 1967; RHOADES *et*  
91 *al.* 1967; DUNN AND BENNETT 1968; ZIMMERING *et al.* 1970; FISHMAN AND SAUNDERS  
92 2008). Many known drive loci are located on sex chromosomes (especially in various  
93 *Drosophila* species) and are associated with inversions or other cytological changes  
94 (STURTEVANT AND DOBZHANSKY 1936; ZIMMERING *et al.* 1970; FISHMAN AND SAUNDERS  
95 2008). Drive loci on sex chromosomes are more readily identified because they alter the  
96 sex ratio, which is easily noticed without molecular biology assays.

97 Transmission biases arising after formation of the haploid gametes are classified  
98 as instances of gametic selection. Due to the differences of male and female  
99 gametogenesis, gametic selection can be more easily detected in males. Sperm is  
100 produced from all four meiotic products, and each of these haploid sperm cells can  
101 compete for the ability to fertilize the ovule. A classic example of gametic selection

102 involves growth of the pollen tube that delivers the male gametes of plants (SNOW *et al.*  
103 2000). For example, differential pollen tube growth can improve the reproductive  
104 success of the genotype that elongates more quickly.

105         A few instances of segregation distortion are well understood, but knowledge of  
106 the species-wide prevalence of the phenomenon is mostly missing. Despite the  
107 apparent ubiquity of segregation distortion, it is unclear how often epistatic  
108 incompatibilities, gametic selection, or meiotic drive are the cause. In *A. thaliana*,  
109 segregation distortion due to partially or fully recessively acting alleles has been  
110 observed repeatedly in different experimental population designs (LISTER AND DEAN  
111 1993; MITCHELL-OLDS 1995; ALONSO-BLANCO *et al.* 1998; LOUDET *et al.* 2002; WERNER *et*  
112 *al.* 2005; SIMON *et al.* 2008; TÖRJÉK *et al.* 2008; BALASUBRAMANIAN *et al.* 2009; SALOMÉ  
113 *et al.* 2012). The largest published study to date in *A. thaliana* examined segregation  
114 distortion in 17 F<sub>2</sub> populations, over half of which exhibited evidence of distortion  
115 (SALOMÉ *et al.* 2012). Although *A. thaliana* is typically a self-fertilizing species,  
116 outcrossing in nature can be quite common, implying that opportunities for unequal  
117 transmission shaping genetic diversity exist (BOMBLIES *et al.* 2010). On the other hand,  
118 the preference for inbreeding creates a system sensitized for detection of intraspecific  
119 distortion, since accessions collected from nature are typically homozygous throughout  
120 the genome. Cross-fertilization between accessions removes an allele from its native,  
121 homozygous context, thus creating an opportunity for biased transmission, which in turn  
122 makes *A. thaliana* an ideal system for the identification of preferentially inherited loci.

123         We have surveyed over 500 segregating F<sub>2</sub> populations for segregation distortion

124 in order to characterize the contribution of biased transmission to the generation of  
125 intraspecific genetic barriers. Segregating  $F_2$  populations were derived from  
126 intercrossing 80 distinct, resequenced *A. thaliana* accessions spanning the Eurasian  
127 range of the species (CAO *et al.* 2011). For this large survey, populations were  
128 genotyped in pools using reduced-representation high-throughput sequencing to  
129 estimate allelic ratios. In addition to documenting the prevalence of segregation  
130 distortion in *A. thaliana*, we have also begun to dissect the population-wide genetic  
131 architecture of segregation distortion. The crosses and genomic regions we have  
132 characterized provide a platform with which to dissect the relative contribution of  
133 deleterious epistatic interactions, male gametic selection, and female drive meiotic to  
134 biased inheritance.

## 135 **Materials and Methods**

136 **Germplasm.** The  $F_2$  populations were generated by intercrossing 80 natural  
137 *Arabidopsis thaliana* accessions with whole-genome resequencing information (CAO *et*  
138 *al.* 2011). Intercrossing was facilitated by induced male sterility which was achieved by  
139 artificial miRNA (amiR) mediated knock-down of the floral homeotic gene APETALA3  
140 (AP3) (CHAE *et al.* 2014). One half of  $F_1$  plants were transgene-free and able to produce  
141  $F_2$  progeny through self-fertilization, as each original female grandparent was  
142 hemizygous for the amiR transgene. In total, 583  $F_2$  populations were generated using  
143 67 of the 80 natural accessions as the female grandparent. All 80 accessions were used  
144 as the male grandparent and, on average, each grandparent contributed to 14.7  $F_2$

145 populations. Germplasm information can be found in Table 1 and grandparental seed  
146 availability is listed in Table S1.

147 **Growth conditions.** At least 300 individuals from each F<sub>2</sub> population were sown  
148 onto 0.5x MS medium (0.7% agar; pH 5.6). Prior to plating, seeds were gas sterilized for  
149 16 hours using 40 ml of household bleach (1-4%) and 1.5 ml of concentrated HCl.  
150 Seeds were stratified at 4°C in the dark for 8 days and then plates were shifted to 23°C  
151 long day conditions (16 h light:8 h dark). After 5 days, seedlings were harvested in bulk  
152 and flash frozen in liquid nitrogen.

153 **DNA extraction and GBS library preparation.** DNA was extracted from each  
154 pool of F<sub>2</sub> individuals using a CTAB procedure (2% CTAB, 1.4 M NaCl, 100 mM Tris (pH  
155 8), 20 mM EDTA (pH 8)) (SPRINGER 2010). DNA integrity was confirmed by gel  
156 electrophoresis, and DNA quantification was performed using the Qubit fluorimeter  
157 (Qubit BR assay) (Thermo Fisher Scientific, Waltham, MA). For library preparation, 300  
158 ng of each DNA sample were diluted in 27 µl. Restriction enzyme-mediated reduced-  
159 representation libraries were generated using KpnI, which is predicted to cleave the *A.*  
160 *thaliana* reference genome into 8,366 fragments. The library preparation protocol is  
161 detailed in (ROWAN *et al.* 2017). Briefly, DNA was digested and then ligated to barcoded  
162 adapter sequences with sticky ends complementary to the KpnI cleavage site. After  
163 ligation, 96 barcoded samples were pooled and then sheared using the Covaris S220  
164 instrument (Covaris, Woburn, MA). Next, end-repair, dA-tailing, a second universal  
165 adapter ligation, and PCR enrichment were performed using the Illumina compatible  
166 NEBNext DNA Library Prep Master Mix Set (NEB, Ipswich, MA). Library quality was



167 determined using the Agilent 2100 Bioanalyzer (DNA 1000 kit) (Agilent, Santa Clara,  
168 CA) and libraries were normalized (10 nM) based on library quantification (ng/ $\mu$ l) and  
169 mean fragment length. Sequencing was performed on the Illumina HiSeq 2000 (Illumina,  
170 San Diego, CA). Adapter sequences can be found in (ROWAN *et al.* 2017).

171 **SNP identification and allele frequency estimation.** SHORE software (v0.9.0)  
172 (OSSOWSKI *et al.* 2008) was used for all analyses described in this section. Sequencing  
173 reads were barcode sorted and quality filtered. During quality filtering the restriction  
174 enzyme overhang was also trimmed using SHORE import. Reads for each bulked  
175 population were then aligned to the TAIR10 reference genome allowing for two  
176 mismatches using SHORE mapflowcell. After alignment, SNPs were called with SHORE  
177 qVar using default parameters. Read counts for both the reference and non-reference  
178 base were extracted for each polymorphic position. SNPs were filtered further using the  
179 grandparental whole-genome information and read counts for the female grandparental  
180 allele were output only for positions expected to be segregating between the two initial  
181 grandparents based on the resequencing data (CAO *et al.* 2011). The allele frequency of  
182 the female grandparental allele was calculated for each polymorphic position as the  
183 number of reads containing the female grandparental allele divided by the total number  
184 of reads covering that position.

185 **Modeling of allele frequency and significance testing for allelic distortion.**  
186 High read coverage was sought for each library to enable accurate allele frequency  
187 estimation. The realized median coverage of the population bulks was 78x. The  
188 distribution of read coverage per library is shown in Fig S1A.

189 Even with high read coverage, allele frequency estimates were still noisy. To  
190 generate accurate allele frequency estimates, the allele frequency was modeled in 5 Mb  
191 sliding windows (0.5 Mb steps). We used a beta-binomial model to account for variation  
192 in the true allele frequency as well as stochastic variation that arises from read  
193 sampling. From the optimized model we extracted the alpha and beta parameters from  
194 each genomic window. These parameters describe the shape of the probability  
195 distribution in each window, and from these parameters the mean allele frequency as  
196 well as the 95% confidence intervals were estimated. Using these estimates, a non-  
197 parametric statistical test was performed to assess whether the allele frequency  
198 estimates were significantly different from 50%, the expected frequency for non-  
199 distorted genomic regions. A false discovery correction (FDR) was performed to account  
200 for the number of genomic windows tested per population ( $n = 240$ ). After allele  
201 frequency estimation, quality control measures culled low quality bulks. Populations  
202 were excluded from subsequent analysis for the following reasons: 1) having a genome-  
203 wide average allele frequency greater than 0.75, 2) exhibiting either confidence intervals  
204 (CI) larger than 0.40 or noisy confidence intervals across the genome (standard  
205 deviation of CI width greater than 0.15), or 3) displaying three or more chromosomes  
206 with windows that did not attain model convergence. After quality control, 492  
207 populations remained for subsequent analyses.

208 **Identification of distorted regions.** Two thresholds were used to identify  
209 significantly distorted genomic windows. The first approach utilized p-value estimates  
210 from the non-parametric statistical test performed on each window. False discovery rate

211 (FDR) corrections were applied to account for the number of tested genomic windows ( $n$   
212 = 240,  $p < 0.05$ ). Distorted populations were required to have at least five adjacent  
213 genomic windows on the biased chromosome with significant FDR corrected  $p$ -values.  
214 Populations with statistically significant segregation distortion are listed in Table 1.

215 The second, less conservative approach identified outliers by calculating  $Z$ -  
216 scores for each genomic window relative to the mean allele frequency of all surveyed  $F_2$   
217 populations (0.5029). Allele frequencies for each window were derived from the beta-  
218 binomial model predictions. Genomic windows with allele frequency estimates greater  
219 than 2.5 times the population-wide standard deviation (0.0382) were considered to be  
220 distorted. A distorted  $F_2$  population was required to contain five genomic windows with  
221 significant  $Z$ -scores on the chromosomes containing the locus of interest. Distorted  
222 populations identified using extreme  $Z$ -scores are listed in Table 1.

223 **Interval identification using whole-genome resequencing.** Six  $F_2$  populations  
224 displayed severe distortion at one of six distinct genomic regions (Fig S4). 1,500  
225 individuals were sown from each of these six populations onto 0.5x MS medium (0.7%  
226 agar; pH 5.6) as described for the initial screen. DNA was extracted from each  
227 population bulk using a standard CTAB preparation (2% CTAB, 1.4 M NaCl, 100 mM  
228 Tris (pH 8), 20 mM EDTA (pH 8)). Illumina TruSeq libraries were prepared according to  
229 manufacturer's guidelines using 1  $\mu$ g of starting material per population. Libraries were  
230 sequenced on an Illumina HiSeq 3000 instrument (Illumina, San Diego, CA). Twenty-  
231 one nucleotide long  $k$ -mers were identified directly from the short reads using jellyfish  
232 (v2.2.3) (MARCAIS AND KINGSFORD 2011) with the following arguments: -m 21 -s 300M -t

233 10 -C. Not only does jellyfish identify all unique k-mers, but it also calculates the  
234 occurrence, or coverage, of each k-mer. The distribution of 21-mer coverages is shown  
235 in Figure S3 for each population. 21-mers found in only one of the two grandparental  
236 genomes (coverage < 25X) were aligned to the TAIR10 genome using bwa aln (LI AND  
237 DURBIN 2009). Only perfect matches were allowed. A 1 Mb sliding window (50 kb steps)  
238 was used to plot the 21-mer coverage across the distorted chromosome in each  
239 population. Regions of the genome with reduced coverage of 21-mers are located within  
240 the candidate interval (Fig 6B, S4). Interval boundaries were delineated by merging all  
241 windows with values within 1x coverage of the minimal window in the candidate region.

242 **Interval identification for distortion bulked segregant analysis.** Bulked  
243 segregant analysis (MICHELMORE *et al.* 1991) was used to narrow the candidate intervals  
244 for Star-8, ICE49, and ICE63. Sequencing reads from the original screen were  
245 combined for all distorted populations sharing the grandparent of interest, resulting in a  
246 distorted bulk. Those that shared the grandparent, but did not exhibit distortion, were  
247 combined separately, resulting in a normal bulk. Positions segregating between the  
248 grandparent of interest and all other members of the bulk were identified. The positions  
249 segregating in the distorted bulk are not shared with those segregating in the normal  
250 bulk. By combining reads from multiple populations, a median of 806 to 1135x coverage  
251 was achieved at each segregating position. Candidate intervals were calculated from  
252 the maximally distorted position to any flanking segregating site that was within 5% of  
253 the peak allele frequency (Table 2).

254           **Material and data availability:** Seeds for grandparental lines are available from  
255 the Arabidopsis Biological Resource Center (ABRC) or the European Arabidopsis Stock  
256 Center (NASC); stock identifiers are listed in Table S1. The source code to generate  
257 allele frequency estimates and the raw allele frequencies for each F<sub>2</sub> population are  
258 located in the following github repository:  
259 [https://github.com/dkseym/F2\\_Segregation\\_Distortion](https://github.com/dkseym/F2_Segregation_Distortion).

## 260 **Results**

261 **Frequent segregation distortion in intraspecific *A. thaliana* F<sub>2</sub> populations.** The  
262 incidence of segregation distortion, a molecular signature of genetic conflict, was  
263 surveyed in 583 F<sub>2</sub> populations generated from naturally inbred accessions that  
264 represent much of the Eurasian genetic diversity in *A. thaliana* (CAO *et al.* 2011). The  
265 studied F<sub>2</sub> populations were derived from crosses between 67 accessions used as  
266 female and male grandparents, and a further 13 that were used only as male  
267 grandparents (CAO *et al.* 2011). The number of crosses performed per accession  
268 ranged from 3 to 34, with a median of 14 F<sub>2</sub> populations generated from each  
269 grandparent.

270 F<sub>2</sub> seeds were sown on plates, stratified at 4°C to break dormancy, and then  
271 grown for five days in 23°C long days. At least 300 individuals per F<sub>2</sub> population were  
272 harvested in bulk for genome-wide genotyping-by-sequencing (GBS), implemented as  
273 restriction enzyme-mediated reduced-representation sequencing. Based on previous  
274 reduced-representation approaches (BAIRD *et al.* 2008; MONSON-MILLER *et al.* 2012), a

275 custom protocol was developed to adapt this method to the specific requirements of our  
276 system. Accurate allele frequency estimate in bulks requires high sequencing coverage  
277 at each segregating site. The selected restriction enzyme, KpnI, cuts infrequently in the  
278 *A. thaliana* genome, allowing high coverage to be achieved for a portion of the genome,  
279 about 1%, with moderate sequencing effort. Whole-genome SNP information was  
280 available for the inbred grandparents (CAO *et al.* 2011), facilitating identification of  
281 informative sites. We attained an average of 78x coverage per F<sub>2</sub> population (Fig S1A),  
282 and an average of 2,509 sites were segregating in any given population (Fig S1B).

283       Regions displaying significant segregation distortion, as indicated by deviation  
284 from the expected 1:1 ratio of grandparental alleles, were identified by modeling the  
285 allele frequency in 5 Mb sliding windows, with 0.5 Mb steps. Using the beta-binomial  
286 model estimates of allele frequencies together with the confidence intervals of the  
287 estimates, a non-parametric statistical test was performed in each window. In total, 62  
288 populations exhibited regions of significant segregation distortion after false discovery  
289 rate (FDR) correction for the number of tested windows ( $n = 240$ ,  $p < 0.05$ ). When  
290 considering only the 492 populations passing quality control measures, 62 (12.6%) of  
291 these were found to harbor genomic regions with significant distortion (Fig S2). This is a  
292 rather conservative estimate of the incidence of segregation distortion in our crosses,  
293 because the ability to detect significant distortion is highly dependent on the size of the  
294 confidence interval estimates (i.e., the coverage of each population).

295       To generate a less conservative estimate of the number of distorted regions, we  
296 also used a Z-score outlier approach. Any region with allele frequencies greater than 2.5

297 standard deviations from the combined population mean was considered to be distorted.  
298 This less conservative approach identified 122 (24.8%) of the 492 populations with at  
299 least a single distorted region (Fig 1). All regions identified via the FDR method were  
300 also detected using the Z-score outlier approach.

301 An example of a chromosome with a distorted region that was identified using  
302 both methods is shown in Figure 2. Although we did not screen the complete diallel of  
303 possible F<sub>2</sub> combinations, we did survey populations that sampled a large fraction of the  
304 genetic space covered by the 80 founders (Fig 1, Fig S2). That segregation distortion is  
305 evident in up to 24% of surveyed F<sub>2</sub> populations suggests that intraspecific genetic  
306 barriers are much more common than previously anticipated.

307 **The dynamics of segregation distortion in *A. thaliana*.** The genetics of  
308 segregation distortion is dictated by the biological process driving the observed non-  
309 Mendelian inheritance. To understand the relative contribution of different processes  
310 such as genetic incompatibility, meiotic drive, and gametic selection, we determined  
311 how many genomic regions showed segregation distortion in our data set.

312 Regardless of identification method – FDR or Z-score outlier –, the majority of  
313 populations exhibited distortion at only a single locus (Fig 3A). If classical Bateson-  
314 Dobzhansky-Muller genetic incompatibilities were driving segregation distortion in our  
315 populations, we would expect two distorted regions per population, unless the  
316 responsible loci were linked. We also found that distortion occurs on all five  
317 chromosomes, although distorted regions are most frequently located on chromosome 1  
318 (Fig 3B).

319 The alleles in distorted regions that are favored to be inherited are derived from  
320 many grandparental accessions. Of the 80 accessions used as founders, over 50 gave  
321 rise to  $F_2$  populations exhibiting significant segregation distortion. Some grandparents  
322 were especially notable, such as Star-8. Regions with alleles contributed by Star-8 were  
323 distorted in 60% of  $F_2$  populations (40% for the FDR threshold) (Fig 4A,B).

324 If genetic barriers are primarily caused by genetic drift as individuals diverge from  
325 a common ancestor, we would expect more distantly related accessions to give rise to  
326 distortion more frequently (LEPPALA *et al.* 2013). As the grandparental accessions had  
327 been sampled from eight geographic regions representative of Eurasian genetic  
328 diversity (CAO *et al.* 2011), we were able to test if genetic diversity between the two  $F_2$   
329 grandparents was correlated with the probability of segregation distortion. We found no  
330 significant difference between the genetic distances of grandparents of distorted  
331 populations compared to grandparents of non-distorted populations (Wilcoxon rank-sum  
332 test, 1% significance threshold;  $p=0.03$  [Z-score outlier distortion list],  $p = 0.11$  [FDR  
333 list]) (Fig 5A,B). That genetic diversity is not a strong predictor of segregation distortion  
334 suggests that genetic drift, which becomes more notable after longer periods of  
335 separation, is not necessarily the most important driver of intraspecific genetic barriers  
336 in *A. thaliana*.

337 **Refining candidate intervals surrounding distorted loci.** To begin to  
338 understand which processes are responsible for the observed segregation distortion, we  
339 sought to define the minimal size of distorted genomic intervals. Genotyping  $F_2$   
340 individuals in bulk enabled screening of a large number of test populations, but without



341 genotype information from individual segregants to estimate recombination breakpoints,  
342 most candidate regions are not much smaller than entire chromosome arms.

343         Since we did not know a priori which populations would be the most informative  
344 to study in detail, we designed two strategies to narrow the candidate regions to  
345 facilitate subsequent fine-mapping. First, we increased the density of informative  
346 markers about 200 fold by whole-genome resequencing of six populations with severe  
347 segregation distortion. We also increased the number of recombination events in these  
348 populations by analysis of 1,500  $F_2$  individuals from each of the six populations. We  
349 sequenced these bulks to approximately 40x coverage. Although this coverage was  
350 lower than the average 78x coverage we had used in our GBS analyses, by integrating  
351 over multiple markers, together with the larger number of  $F_2$  individuals and thus  
352 recombination events, we expected this to substantially improve our power to delineate  
353 distorted regions.

354         Unfortunately, exploratory analyses indicated that the lower coverage at  
355 individual markers is accompanied by increased stochasticity in allele frequency  
356 estimates. We therefore took advantage of local linkage disequilibrium to diminish that  
357 noise. Short stretches of unique 21 nucleotide (nt) sequences (known as k-mers or 21-  
358 mers) were identified in the raw sequencing reads of each  $F_2$  population. Any 21-mer  
359 sequence shared between grandparents should occur at the average genome-wide  
360 coverage, and when we plotted 21-mer frequencies, we found a major found peak of 21-  
361 mer coverage around 40x, the average per-population whole-genome coverage, in all  
362 six populations, as expected (Fig 6A, S3). In contrast, 21-mers present in only one of

363 the two parents should have approximately half as much coverage, and a second peak,  
364 resulting from a much smaller number of 21-mers, was apparent in all populations as  
365 well (Fig 6A, S3).

366 To narrow down candidate intervals, we extracted 21-mers that were predicted to  
367 be present in only one of the two grandparents. Regions of the genome that are  
368 distorted should display a decrease in coverage of such grandparent-specific 21-mers  
369 near the causal locus. We used a sliding window approach (1 Mb windows, 50 kb steps)  
370 to calculate the average coverage of such 21-mers. Using this strategy, we were able to  
371 narrow the intervals surrounding four of the six candidate loci to less than 5 Mb, and in  
372 one case to 1.5 Mb (Table 2, Fig 6B, S4).

373 In a complementary approach, we sought to refine candidate regions by  
374 obtaining a more precise estimate of local allele frequency. To this end, we greatly  
375 increased sequencing coverage by combining information from cases with shared  
376 grandparents and the same distorted regions. As mentioned earlier, some  
377 grandparental accessions contributed alleles that were favored in multiple  $F_2$   
378 populations. Star-8, ICE63, and ICE49 contributed alleles that were favored in at least  
379 40% of crosses of these to other accessions (based on the Z-score outlier method), with  
380 the same regions being favored in all distorted populations sharing a particular  
381 grandparent. Using a bulked segregant analysis approach (MICHELMORE *et al.* 1991), we  
382 generated two pools of reads for each grandparent. One comprised the sequencing  
383 reads from all distorted populations and the other contained the sequencing reads from  
384 all non-distorted populations. The allele frequency of SNPs was calculated for sites

385 segregating between the focal grandparent and all other accessions in either the  
386 distorted pool or the non-distorted pool.

387         A median coverage of at least 806x was achieved at each segregating site, vastly  
388 improving the accuracy of our estimates. For one grandparent, Star-8, we narrowed the  
389 interval to 2.0 Mb, in the middle of the top arm of chromosome 1, where recombination  
390 is high (Table 2, Fig 6C). This strategy was less successful for the other two  
391 grandparents, ICE63 and ICE49, likely because of the distortion being less strong in  
392 these cases as well as the location of the distorted regions near the centromere or on  
393 the distal chromosome arm, both parts of the chromosome where recombination is  
394 reduced (Table 2, Fig S5).

## 395 **Discussion**

396 Despite the ubiquity of non-Mendelian segregation of alleles in natural populations, the  
397 genetic and molecular characterization of the responsible loci has been lagging  
398 (reviewed in (ZIMMERING *et al.* 1970; LYTTLE 1991; LYON 2003; FISHMAN AND SAUNDERS  
399 2008; PHADNIS AND ORR 2009; HAMMOND *et al.* 2012; LARRACUENTE AND PRESGRAVES  
400 2012). Such systems are most easily studied, when distortion is severe and differences  
401 in phenotypically distinct progeny classes are obvious (reviewed in (ZIMMERING *et al.*  
402 1970)). Because sexual dimorphism is common, many of the earliest known cases were  
403 discovered because sex-ratio deviated greatly from 1:1 (reviewed in (ZIMMERING *et al.*  
404 1970)). The effects of an allele that is preferentially inherited can be neutralized in a  
405 population by fixation of the allele or by the evolution of secondary modifiers. Many

406 cases of segregation distortion were discovered in interspecific crosses (CAMERON AND  
407 MOAV 1957; MAGUIRE 1963; SIRACUSA *et al.* 1991; TAO *et al.* 2001; FISHMAN AND  
408 SAUNDERS 2008; ZANDERS *et al.* 2014), not because the phenomenon is more common  
409 in interspecific hybrids, but because the severity of distortion is extreme in the absence  
410 of species-specific modifiers, sometimes reaching fixation in only a generation or two  
411 (FISHMAN AND SAUNDERS 2008). The same loci responsible for segregation distortion in  
412 interspecific crosses may also underlie unexpected intraspecific segregation patterns.  
413 However, in intraspecific crosses, allele frequencies are often only perturbed by a few  
414 percent (LYTTLE 1991; FISHMAN AND SAUNDERS 2008), and without molecular genotyping  
415 techniques, such subtle allelic distortion will go mostly undetected.

416         Exploiting advances in sequencing and genotyping technology, we have been  
417 able to characterize segregation distortion in hundreds of intraspecific crosses. The  
418 identification of distorted regions greatly depends on sequencing coverage; in our  
419 system, a 10% deviation in absolute allele frequency becomes significant with  
420 approximately 100x sequence coverage, and more subtly distorted regions could be  
421 detected with even higher coverage. Similar pooled genotyping approaches have been  
422 used to identify distorted loci in other systems (CUI *et al.* 2015; BELANGER *et al.* 2016a;  
423 BELANGER *et al.* 2016b; WEI *et al.* 2017), illustrating the general power of this approach.

424         Although *A. thaliana* is self-compatible, outcrossing is reasonably common, and  
425 descendants of recent outcrossing events are easily found in wild stands of this species  
426 (BOMBLIES *et al.* 2010). By surveying a broad collection of germplasm for non-Mendelian  
427 inheritance, we could confirm that allelic distortion is a common feature of F<sub>2</sub>

428 populations, implying that allelic distortion has a major impact on shaping local genetic  
429 diversity. Not only do distorted loci segregate in up to a quarter of all F<sub>2</sub> populations, but  
430 multiple genomic regions contribute to this phenomenon, with the degree of distortion  
431 varying both by population and by locus. Intraspecific distortion loci that have been  
432 identified in other systems typically occur at low population frequencies (HICKEY AND  
433 CRAIG 1966; PERKINS AND BARRY 1977; HIRAIZUMI AND THOMAS 1984; HAMMER *et al.*  
434 1989; McMULLEN *et al.* 2009; HOU *et al.* 2015; FRAGOSO *et al.* 2017), although there are  
435 exceptions, such as the tightly linked *zeel-1* and *peel-1* genes in *C. elegans* (SEIDEL *et*  
436 *al.* 2008; BEN-DAVID *et al.* 2017). The low frequency of the causal alleles has been  
437 hypothesized to result from antagonistic modifier loci having evolved in response to the  
438 fitness costs that are often linked to distortion loci (reviewed in (ZIMMERING *et al.* 1970;  
439 LYTTLE 1991)). In an interspecific *Drosophila* cross, the causal locus itself is responsible  
440 for both the distortion phenotype and for reduced gamete success (PHADNIS AND ORR  
441 2009). We have found multiple cases of genomic regions that are distorted in one or  
442 very few population(s), suggesting that frequency of distortion alleles is often low in *A.*  
443 *thaliana* as well. This could be because these alleles are older, giving sufficient time for  
444 modifiers to evolve and rise to high frequency. If these are linked, we would not have  
445 detected them as separate genomic loci, as our mapping resolution was mostly  
446 chromosome arm scale.

447       Of particular interest are regions that are repeatedly distorted across many  
448 populations at extreme frequencies. For example, the Star-8 region on chromosome 1 is  
449 significantly favored in ~50% of crosses, with this region being inherited by up to 70 or

450 even 80% of the progeny. This could be an example of a young allele for which  
451 suppressors have not yet evolved, or it could be that the balance between fitness costs  
452 (if any) and the degree of distortion is stable at this frequency. The *D* locus in *Mimulus*  
453 *guttatus* is perhaps the best example of a stable distortion polymorphism, in this case  
454 caused by meiotic drive (FISHMAN AND SAUNDERS 2008). The measured degree of  
455 distortion at this locus (58:42) is predicted by the associated decrease in pollen viability  
456 (FISHMAN AND SAUNDERS 2008). This allele is segregating in about half of all individuals  
457 from a natural population (FISHMAN AND SAUNDERS 2008). Other instances of distortion  
458 loci segregating at intermediate frequencies are known, but the evolutionary dynamics  
459 of these cases are not as well characterized (reviewed in (ZIMMERING *et al.* 1970; LYTTLE  
460 1991))

461 A peculiarity of allelic distortion in our panel of *A. thaliana* crosses is that in most  
462 cases, only a single genomic region is inherited in a non-Mendelian fashion. Classic  
463 meiotic drive systems consist of a distorter locus and a responder locus, with the two  
464 being almost always linked through an inversion or genetic rearrangement that reduces  
465 recombination between them (STALKER 1961; WU AND BECKENBACH 1983; SILVER 1985;  
466 LYTTLE 1991). As a result, classic drive loci are inherited as a single distorted genomic  
467 region. Our results are reminiscent of such cases, suggesting that several such loci are  
468 segregating in *A. thaliana*, although we cannot currently infer the number of genes in the  
469 mapping intervals responsible for segregation distortion.

470 Apart from meiotic drive, more conventional two-locus deleterious interactions  
471 conforming to the Bateson-Dobzhansky-Muller model of genetic incompatibilities can

472 also perturb expected allelic (and genotypic) segregation ratios. A survey in *D.*  
473 *melanogaster* showed intraspecific genetic incompatibilities due to epistatic interaction  
474 between two (often unlinked) loci are not uncommon, with natural strains carrying an  
475 average of 1.15 incompatible loci (CORBETT-DETIG *et al.* 2013). Hybrid incompatibility is  
476 a common feature in both plants in animals, with many known cases of deleterious  
477 epistatic interactions between two nuclear loci segregating in *A. thaliana* (BOMBLIES *et*  
478 *al.* 2007; ALCÁZAR *et al.* 2009; BIKARD *et al.* 2009; VLAD *et al.* 2010; DURAND *et al.* 2012;  
479 CHAE *et al.* 2014; AGORIO *et al.* 2017; PLÖTNER *et al.* 2017). In our set of crosses,  
480 simultaneous distortion at two independent genomic regions was the exception. In our  
481 design, incompatible interactions would only be detectable if the  $F_1$  was fertile and  
482 dominance relationship between alleles was such that over 10% of the progeny did not  
483 give rise to seedlings. In other words, if both genes acted completely recessively and  
484 the doubly homozygous progeny failed to grow, they still would not be noticed in our  
485 segregation distortion scans. We note that even in cases where two independent  
486 genomic regions are significantly distorted in a single population, the absence of  
487 genotype data for individuals does not allow us to explicitly examine if these regions  
488 genetically interact. Although the nature of our experimental design has not yet revealed  
489 the species-wide architecture of partially or fully recessive epistatic interactions  
490 segregating in *A. thaliana*, this can be addressed in future studies by genotyping  
491 individuals instead of pools.

492 While a handful of classical segregation distortion loci has been molecularly  
493 characterized in detail (reviewed in (ZIMMERING *et al.* 1970; LYTTLE 1991; LYON 2003;

494 LARRACUENTE AND PRESGRAVES 2012)), the molecular nature of most loci is still  
495 unknown. As a result, there is still much to be learned about the biological processes  
496 and evolutionary forces leading to uneven segregation, including whether such alleles  
497 are more likely to be evolutionarily old or young. For example, numerous cases of hybrid  
498 incompatibilities in *A. thaliana* are due to interactions between disease resistance  
499 genes, which have very divergent alleles, both because of rapid evolution and long-term  
500 balancing selection (BOMBLIES *et al.* 2007; ALCÁZAR *et al.* 2009; DURAND *et al.* 2012;  
501 CHAE *et al.* 2014). The fast evolution of centromeres and other satellite sequence  
502 repeats, a result of intragenomic conflict, has also been shown to cause or to be closely  
503 linked to allelic distortion (WU *et al.* 1988; FISHMAN AND SAUNDERS 2008; CHMATAL *et al.*  
504 2014; MAHESHWARI *et al.* 2015). In our crosses, distorted regions often localized near  
505 centromeres.

506         Whether the conflict arises in interspecific or intraspecific crosses, it appears that  
507 natural selection, not genetic drift, is often responsible for the evolution of non-  
508 Mendelian inheritance. In support of this, we found little correlation between the degree  
509 of genetic differentiation between the grandparental accessions and the probability of  
510 observing allelic distortion in their progeny, in line with what has been seen in a much  
511 smaller panel of F<sub>2</sub> populations (SALOMÉ *et al.* 2012).

512         To conclude, by surveying a large number of F<sub>2</sub> populations descending from 80  
513 genetically diverse grandparents, we were able to identify numerous genomic regions in  
514 *A. thaliana* that are not transmitted in a Mendelian fashion. Considering that our  
515 statistical power would not have allowed us to discover complete absence of genotypes



516 resulting from higher-order epistatic interactions, it is likely that the regions we identified  
517 are only the tip of the iceberg. Notably, the majority of accessions tested contributed  
518 such distorted alleles, emphasizing the ubiquity of alleles that are unevenly transmitted.  
519 Together, these findings confirm the findings from other systems that genetic barriers  
520 segregating within wild species are more common than previously thought (SEIDEL *et al.*  
521 2008; CORBETT-DETIG *et al.* 2013; HOU *et al.* 2015).

## 522 **Author contributions**

523 D.K.S., D.K., E.C. and D.W. conceived the project. D.K.S., E.C. and B.I.A. generated  
524 the material and data. D.K.S. and D.K. analyzed the data. D.K.S. and D.W. wrote the  
525 manuscript with contributions from all authors.

## 526 **Acknowledgments**

527 This work was supported by ERC AdG IMMUNEMESIS and the Max Planck Society.

## 528 **References**

- 529 Agorio, A., S. Durand, E. Fiume, C. Brousse, I. Gy *et al.*, 2017 An *Arabidopsis* natural  
530 epiallele maintained by a feed-forward silencing loop between histone and DNA.  
531 PLoS Genet 13: e1006551.
- 532 Alcázar, R., A. V. Garcia, J. E. Parker and M. Reymond, 2009 Incremental steps toward  
533 incompatibility revealed by *Arabidopsis* epistatic interactions modulating salicylic  
534 acid pathway activation. Proc Natl Acad Sci USA 106: 334-339.

- 535 Alonso-Blanco, C., A. J. Peeters, M. Koornneef, C. Lister, C. Dean *et al.*, 1998  
536 Development of an AFLP based linkage map of Ler, Col and Cvi *Arabidopsis*  
537 *thaliana* ecotypes and construction of a Ler/Cvi recombinant inbred line  
538 population. Plant J 14: 259-271.
- 539 Baird, N. A., P. D. Etter, T. S. Atwood, M. C. Currey, A. L. Shiver *et al.*, 2008 Rapid SNP  
540 discovery and genetic mapping using sequenced RAD markers. PLoS ONE 3:  
541 e3376.
- 542 Balasubramanian, S., C. Schwartz, A. Singh, N. Warthmann, M. C. Kim *et al.*, 2009 QTL  
543 mapping in new *Arabidopsis thaliana* advanced intercross-recombinant inbred  
544 lines. PLoS ONE 4: e4318.
- 545 Belanger, S., I. Clermont, P. Esteves and F. Belzile, 2016a Extent and overlap of  
546 segregation distortion regions in 12 barley crosses determined via a Pool-GBS  
547 approach. Theor Appl Genet 129: 1393-1404.
- 548 Belanger, S., P. Esteves, I. Clermont, M. Jean and F. Belzile, 2016b Genotyping-by-  
549 sequencing on pooled samples and its use in measuring segregation bias during  
550 the course of androgenesis in barley. Plant Genome 9.
- 551 Ben-David, E., A. Burga and L. Kruglyak, 2017 A maternal-effect selfish genetic element  
552 in *Caenorhabditis elegans*. Science 356: 1051-1055.
- 553 Bikard, D., D. Patel, C. Le Mette, V. Giorgi, C. Camilleri *et al.*, 2009 Divergent evolution  
554 of duplicate genes leads to genetic incompatibilities within *A. thaliana*. Science  
555 323: 623-626.

- 556 Bomblies, K., J. Lempe, P. Epple, N. Warthmann, C. Lanz *et al.*, 2007 Autoimmune  
557 response as a mechanism for a Dobzhansky-Muller-type incompatibility  
558 syndrome in plants. *PLoS Biol* 5: e236.
- 559 Bomblies, K., and D. Weigel, 2007 Hybrid necrosis: autoimmunity as a potential gene-  
560 flow barrier in plant species. *Nat Rev Genet*. 8: 382-393.
- 561 Bomblies, K., L. Yant, R. Laitinen, S.-T. Kim, J. D. Hollister *et al.*, 2010 Local-scale  
562 patterns of genetic variability, outcrossing and spatial structure in natural stands  
563 of *Arabidopsis thaliana*. *PLoS Genet* 6: e1000890.
- 564 Cameron, D. R., and R. M. Moav, 1957 Inheritance in *Nicotiana tabacum*. XXVII. Pollen  
565 killer, an alien genetic locus inducing abortion of microspores not carrying it.  
566 *Genetics* 42: 326-335.
- 567 Cao, J., K. Schneeberger, S. Ossowski, T. Günther, S. Bender *et al.*, 2011 Whole-  
568 genome sequencing of multiple *Arabidopsis thaliana* populations. *Nat Genet* 43:  
569 956-963.
- 570 Chae, E., K. Bomblies, S. T. Kim, D. Karelina, M. Zaidem *et al.*, 2014 Species-wide  
571 genetic incompatibility analysis identifies immune genes as hot spots of  
572 deleterious epistasis. *Cell* 159: 1341-1351.
- 573 Chmatal, L., S. I. Gabriel, G. P. Mitsainas, J. Martinez-Vargas, J. Ventura *et al.*, 2014  
574 Centromere strength provides the cell biological basis for meiotic drive and  
575 karyotype evolution in mice. *Curr Biol* 24: 2295-2300.
- 576 Corbett-Detig, R. B., J. Zhou, A. G. Clark, D. L. Hartl and J. F. Ayroles, 2013 Genetic  
577 incompatibilities are widespread within species. *Nature* 504: 135-137.

- 578 Cui, Y., F. Zhang, J. Xu, Z. Li and S. Xu, 2015 Mapping quantitative trait loci in selected  
579 breeding populations: A segregation distortion approach. *Heredity* 115: 538-546.
- 580 Dunn, L. C., and D. Bennett, 1968 A new case of transmission ratio distortion in house  
581 mouse. *Proc Natl Acad Sci U S A* 61: 570-573.
- 582 Durand, S., N. Bouché, E. Perez Strand, O. Loudet and C. Camilleri, 2012 Rapid  
583 establishment of genetic incompatibility through natural epigenetic variation. *Curr*  
584 *Biol* 22: 326-331.
- 585 Fishman, L., and A. Saunders, 2008 Centromere-associated female meiotic drive entails  
586 male fitness costs in monkeyflowers. *Science* 322: 1559-1562.
- 587 Fragoso, C. A., M. Moreno, Z. Wang, C. Heffelfinger, L. J. Arbelaez *et al.*, 2017 Genetic  
588 architecture of a rice nested association mapping population. *G3* 7: 1913-1926.
- 589 Hammer, M. F., J. Schimenti and L. M. Silver, 1989 Evolution of mouse chromosome 17  
590 and the origin of inversions associated with t haplotypes. *Proc Natl Acad Sci U S*  
591 *A* 86: 3261-3265.
- 592 Hammond, T. M., D. G. Rehard, H. Xiao and P. K. Shiu, 2012 Molecular dissection of  
593 *Neurospora* Spore killer meiotic drive elements. *Proc Natl Acad Sci U S A* 109:  
594 12093-12098.
- 595 Hartl, D. L., Hiraizum.Y and J. F. Crow, 1967 Evidence for sperm dysfunction as  
596 mechanism of segregation distortion in *Drosophila melanogaster*. *Proc Natl Acad*  
597 *Sci U S A* 58: 2240-2245.
- 598 Hickey, W. A., and G. B. Craig, Jr., 1966 Distortion of sex ratio in populations of *Aedes*  
599 *aegypti*. *Can J Genet Cytol* 8: 260-278.

- 600 Hiraizumi, Y., and A. M. Thomas, 1984 Suppressor systems of Segregation Distorter  
601 (SD) chromosomes in natural populations of *Drosophila melanogaster*. *Genetics*  
602 106: 279-292.
- 603 Hou, J., A. Friedrich, J. S. Gounot and J. Schacherer, 2015 Comprehensive survey of  
604 condition-specific reproductive isolation reveals genetic incompatibility in yeast.  
605 *Nat Commun* 6: 7214.
- 606 Larracuenta, A. M., and D. C. Presgraves, 2012 The selfish *Segregation Distorter* gene  
607 complex of *Drosophila melanogaster*. *Genetics* 192: 33-53.
- 608 Leppala, J., F. Bokma and O. Savolainen, 2013 Investigating incipient speciation in  
609 *Arabidopsis lyrata* from patterns of transmission ratio distortion. *Genetics* 194:  
610 697-708.
- 611 Li, H., and R. Durbin, 2009 Fast and accurate short read alignment with Burrows-  
612 Wheeler transform. *Bioinformatics* 25: 1754-1760.
- 613 Lister, C., and C. Dean, 1993 Recombinant inbred lines for mapping RFLP and  
614 phenotypic markers in *Arabidopsis thaliana*. *Plant J* 4: 745-750.
- 615 Loudet, O., S. Chaillou, C. Camilleri, D. Bouchez and F. Daniel-Vedele, 2002 Bay-0 x  
616 Shahdara recombinant inbred line population: a powerful tool for the genetic  
617 dissection of complex traits in *Arabidopsis*. *Theor. Appl. Genet.* 104: 1173-1184.
- 618 Lyon, M. F., 2003 Transmission ratio distortion in mice. *Annu Rev Genet* 37: 393-408.
- 619 Lyttle, T. W., 1991 Segregation distorters. *Annu Rev Genet* 25: 511-557.
- 620 Maguire, M. P., 1963 High transmission frequency of a *Tripsacum* chromosome in corn.  
621 *Genetics* 48: 1185-1194.

- 622 Maheshwari, S., E. H. Tan, A. West, F. C. Franklin, L. Comai *et al.*, 2015 Naturally  
623 occurring differences in CENH3 affect chromosome segregation in zygotic  
624 mitosis of hybrids. *PLoS Genet* 11: e1004970.
- 625 Malik, H. S., and S. Henikoff, 2002 Conflict begets complexity: the evolution of  
626 centromeres. *Curr Opin Genet Dev* 12: 711-718.
- 627 Marcais, G., and C. Kingsford, 2011 A fast, lock-free approach for efficient parallel  
628 counting of occurrences of k-mers. *Bioinformatics* 27: 764-770.
- 629 McDermott, S. R., and M. A. Noor, 2010 The role of meiotic drive in hybrid male sterility.  
630 *Philos Trans R Soc Lond B Biol Sci* 365: 1265-1272.
- 631 McMullen, M. D., S. Kresovich, H. S. Villeda, P. Bradbury, H. Li *et al.*, 2009 Genetic  
632 properties of the maize nested association mapping population. *Science* 325:  
633 737-740.
- 634 Michelmore, R. W., I. Paran and R. V. Kesseli, 1991 Identification of markers linked to  
635 disease-resistance genes by bulked segregant analysis: a rapid method to detect  
636 markers in specific genomic regions by using segregating populations. *Proc Natl*  
637 *Acad Sci U S A* 88: 9828-9832.
- 638 Mitchell-Olds, T., 1995 Interval mapping of viability loci causing heterosis in  
639 *Arabidopsis*. *Genetics* 140: 1105-1109.
- 640 Monson-Miller, J., D. C. Sanchez-Mendez, J. Fass, I. M. Henry, T. H. Tai *et al.*, 2012  
641 Reference genome-independent assessment of mutation density using restriction  
642 enzyme-phased sequencing. *BMC Genomics* 13: 72.

- 643 Orr, H. A., 1996 Dobzhansky, Bateson, and the genetics of speciation. *Genetics* 144:  
644 1331-1335.
- 645 Orr, H. A., and D. C. Presgraves, 2000 Speciation by postzygotic isolation: forces,  
646 genes and molecules. *Bioessays* 22: 1085-1094.
- 647 Ossowski, S., K. Schneeberger, R. M. Clark, C. Lanz, N. Warthmann *et al.*, 2008  
648 Sequencing of natural strains of *Arabidopsis thaliana* with short reads. *Genome*  
649 *Res.* 18: 2024-2033.
- 650 Perkins, D. D., and E. G. Barry, 1977 The cytogenetics of *Neurospora*. *Adv Genet* 19:  
651 133-285.
- 652 Phadnis, N., and H. A. Orr, 2009 A single gene causes both male sterility and  
653 segregation distortion in *Drosophila* hybrids. *Science* 323: 376-379.
- 654 Plötner, B., M. Nurmi, A. Fischer, M. Watanabe, K. Schneeberger *et al.*, 2017 Chlorosis  
655 caused by two recessively interacting genes reveals a role of RNA helicase in  
656 hybrid breakdown in *Arabidopsis thaliana*. *Plant J*, doi doi: 10.1111/tpj.13560.
- 657 Presgraves, D. C., 2010 The molecular evolutionary basis of species formation. *Nat Rev*  
658 *Genet* 11: 175-180.
- 659 Rhoades, M. M., 1942 Preferential segregation in maize. *Genetics* 27: 0395-0407.
- 660 Rhoades, M. M., E. Dempsey and A. Ghidoni, 1967 Chromosome Elimination in Maize  
661 Induced by Supernumerary B Chromosomes. *Proc Natl Acad Sci U S A* 57:  
662 1626-1632.
- 663 Rieseberg, L. H., and J. H. Willis, 2007 Plant speciation. *Science* 317: 910-914.

- 664 Rowan, B. A., D. K. Seymour, E. Chae, D. S. Lundberg and D. Weigel, 2017 Methods  
665 for genotyping-by-sequencing. *Methods Mol Biol* 1492: 221-242.
- 666 Salomé, P. A., K. Bomblies, J. Fitz, R. A. Laitinen, N. Warthmann *et al.*, 2012 The  
667 recombination landscape in *Arabidopsis thaliana* F<sub>2</sub> populations. *Heredity* 108:  
668 447-455.
- 669 Sandler, L., Y. Hiraizumi and I. Sandler, 1959 Meiotic drive in natural populations of  
670 *Drosophila melanogaster*. I. the Cytogenetic Basis of Segregation-Distortion.  
671 *Genetics* 44: 233-250.
- 672 Seidel, H. S., M. V. Rockman and L. Kruglyak, 2008 Widespread genetic incompatibility  
673 in *C. elegans* maintained by balancing selection. *Science* 319: 589-594.
- 674 Silver, L. M., 1985 Mouse t haplotypes. *Annu Rev Genet* 19: 179-208.
- 675 Simon, M., O. Loudet, S. Durand, A. Bérard, D. Brunel *et al.*, 2008 Quantitative trait loci  
676 mapping in five new large recombinant inbred line populations of *Arabidopsis*  
677 *thaliana* genotyped with consensus single-nucleotide polymorphism markers.  
678 *Genetics* 178: 2253-2264.
- 679 Siracusa, L. D., W. G. Alvord, W. A. Bickmore, N. A. Jenkins and N. G. Copeland, 1991  
680 Interspecific backcross mice show sex-specific differences in allelic inheritance.  
681 *Genetics* 128: 813-821.
- 682 Snow, A. A., T. P. Spira and H. Liu, 2000 Effects of sequential pollination on the  
683 success of "fast" and "slow" pollen donors in *Hibiscus moscheutos* (Malvaceae).  
684 *Am J Bot* 87: 1656-1659.



- 685 Springer, N. M., 2010 Isolation of plant DNA for PCR and genotyping using organic  
686 extraction and CTAB. Cold Spring Harb Protoc 2010: pdb prot5515.
- 687 Stalker, H. D., 1961 The genetic systems modifying meiotic drive in *Drosophila*  
688 *paramelanica*. Genetics 46: 177-202.
- 689 Sturtevant, A. H., and T. Dobzhansky, 1936 Geographical distribution and cytology of  
690 "sex ratio" in *Drosophila pseudoobscura* and related species. Genetics 21: 473-  
691 490.
- 692 Tao, Y., D. L. Hartl and C. C. Laurie, 2001 Sex-ratio segregation distortion associated  
693 with reproductive isolation in *Drosophila*. Proc Natl Acad Sci U S A 98: 13183-  
694 13188.
- 695 Törjék, O., R. C. Meyer, M. Zehnsdorf, M. Teltow, G. Strompen *et al.*, 2008 Construction  
696 and analysis of two reciprocal *Arabidopsis* introgression line populations. J Hered  
697 99: 396-406.
- 698 Vlad, D., F. Rappaport, M. Simon and O. Loudet, 2010 Gene transposition causing  
699 natural variation for growth in *Arabidopsis thaliana*. PLoS Genet 6: e1000945.
- 700 Wei, K. H., H. M. Reddy, C. Rathnam, J. Lee, D. Lin *et al.*, 2017 A pooled sequencing  
701 approach identifies a candidate meiotic driver in *Drosophila*. Genetics 206: 451-  
702 465.
- 703 Werner, J. D., J. O. Borevitz, N. Warthmann, G. T. Trainer, J. R. Ecker *et al.*, 2005  
704 Quantitative trait locus mapping and DNA array hybridization identify an *FLM*  
705 deletion as a cause for natural flowering-time variation. Proc Natl Acad Sci U S A  
706 102: 2460-2465.

- 707 Wu, C. I., and A. T. Beckenbach, 1983 Evidence for extensive genetic differentiation  
708 between the sex-ratio and the standard arrangement of *Drosophila*  
709 *pseudoobscura* and *D. persimilis* and identification of hybrid sterility factors.  
710 *Genetics* 105: 71-86.
- 711 Wu, C. I., T. W. Lyttle, M. L. Wu and G. F. Lin, 1988 Association between a satellite  
712 DNA sequence and the *Responder of Segregation Distorter* in *D. melanogaster*.  
713 *Cell* 54: 179-189.
- 714 Zanders, S. E., M. T. Eickbush, J. S. Yu, J. W. Kang, K. R. Fowler *et al.*, 2014 Genome  
715 rearrangements and pervasive meiotic drive cause hybrid infertility in fission  
716 yeast. *Elife* 3: e02630.
- 717 Zimmering, S., L. Sandler and B. Nicolett, 1970 Mechanisms of meiotic drive. *Annu Rev*  
718 *Genet* 4: 409-436.
- 719

720 **Tables**

721

722 **Table 1. Germplasm information for surveyed F<sub>2</sub> populations.** All crosses are listed,  
723 with those passing quality control (QC) indicated with a “1”. Similarly, “1” and “0”  
724 indicates whether distortion was detected using FDR significance testing of beta-  
725 binomial modeling of allele frequencies or Z-score deviation.

726

727 **Table 2. Candidate intervals for distorted loci.** ND, not determined.

728

729

730 **Figure legends**

731

732 **Figure 1. Z-score estimated segregation distortion is evident in a wide range of**  
733 **crosses.** Genotypic combinations surveyed in this F<sub>2</sub> screen are shown in blue, and  
734 populations with significant segregation distortion based on Z-score metrics in green.  
735 Grandparental accessions are ordered by the geographic location of their collection  
736 (CAO *et al.* 2011). Female grandparents are located on the y-axis and male  
737 grandparents on the x-axis.

738

739 **Figure 2. A representative F<sub>2</sub> population, POP035 (ICE63 x Vash-1), with**  
740 **significant segregation distortion.** Distortion in this population was detected with both  
741 thresholds (FDR and Z-score outlier). (A) The beta-binomial modeled allele frequency  
742 (blue) across each chromosome is plotted in the upper panel. 95% confidence intervals  
743 are indicated by the shaded grey area and the expected frequency of 0.5 is marked by  
744 the dashed black line. (B) The  $-\log_{10}$  of the p-value derived from the non-parametric  
745 statistical test. The dashed black line in this panel represents the FDR corrected (n =  
746 240) significance threshold ( $p < 0.05$ ).

747

748 **Figure 3. Genomic properties of distorted loci.** (A) The fraction of surveyed F<sub>2</sub>  
749 populations that exhibited segregation distortion at either one or two genomic loci. (B)

750 The number of populations containing distorted loci that reside on each of the five *A.*  
751 *thaliana* chromosomes.

752

753 **Figure 4. Many grandparental accessions contributed biased alleles.** Each  
754 grandparent contributed its genetic material to a median of 14 distinct F<sub>2</sub> populations.  
755 Plotted is the fraction of F<sub>2</sub> populations with one shared grandparent that are  
756 significantly distorted as measured either by (A) because of FDR corrected deviation  
757 from beta-binomial modeled allele frequencies, or (B) 2.5x Z-score deviation.

758

759 **Figure 5. Genetic distance between grandparental accessions is not predictive of**  
760 **biased allelic transmission.** A box plot of genetic distances between the  
761 grandparental accessions of normal (grey) and distorted (colored) F<sub>2</sub> populations. At a  
762 significance threshold of  $p < 0.01$ , the genetic distances between grandparents of  
763 distorted populations determined from FDR corrected deviation (A) or 2.5x Z-score  
764 deviation (B) is not significantly different from that of normal populations (Wilcoxon rank  
765 sum test). Genetic distance was calculated as the number of segregating sites over the  
766 number of interrogated sites. All positions were required to have complete coverage  
767 across all 80 grandparental accessions.

768

769 **Figure 6. Mapping intervals refined using k-mer coverage and bulked segregant**  
770 **analysis.** (A) The coverage of unique 21 nt k-mers is plotted for POP035 (ICE63 x  
771 Vash-1) after whole-genome resequencing. The first peak in coverage represents 21-

772 mers found in only one of the two grandparents (red arrow), while the second, larger  
773 peak represents those sequences found in both (black arrow). (B) The upper panel  
774 displays the beta-binomial modeled allele frequency estimates (blue) and their 95%  
775 confidence intervals (grey) for POP035 as described in the legend for Figure 2. In the  
776 lower panel, the coverage of 21-mers unique to only one of the two grandparents  
777 (coverage < 25x) is plotted in 1 Mb sliding windows (50 kb steps). Coverage decreases  
778 in the candidate regions. Intervals (grey box) are defined by merging windows with  
779 values within 1x coverage of the minimal window in each population. (C) Bulked  
780 segregant analysis was performed for Star-8, an accession that repeatedly contributed  
781 distorted loci. Sequencing reads were combined for populations exhibiting distortion  
782 when crossed with Star-8, and for populations not exhibiting distortion when crossed to  
783 Star-8 (normal pool). A candidate interval (grey box) was obtained by merging all  
784 segregating positions within 5% of the maximal allele frequency.

785

786

787

788 **Supplemental tables**

789

790 **Table S1. Germplasm identifiers.**

## 791 **Supplemental figure legends**

792

793 **Figure S1. Reduced-representation sequencing reliably enriches for 1% of the *A.***  
794 ***thaliana* genome.** (A) Mean sequencing coverage at sites segregating in each F<sub>2</sub>  
795 population. (B) Number of sites segregating in each F<sub>2</sub> population. The mean observed  
796 number of segregating sites (2,500) is comparable to the expected number of  
797 segregating sites derived from previously published resequencing data (CAO *et al.*  
798 2011).

799

800 **Figure S2. Statistically significant segregation distortion is evident in a wide**  
801 **range of crosses.** Genotypic combinations surveyed in this F<sub>2</sub> screen are shown in  
802 blue, and populations with significant segregation distortion based on non-parametric  
803 statistical tests of beta-binomial modeled allele frequencies in green. Grandparental  
804 accessions are ordered by the geographic region of their collection (CAO *et al.* 2011).  
805 Female grandparents are located on the y-axis and male grandparents on the x-axis.

806

807 **Figure S3. Distribution of unique 21-mers in whole-genome resequencing data.**  
808 The coverage of unique 21 nt k-mers is plotted for each of the six populations that  
809 underwent whole-genome resequencing. The first peak in coverage represents 21-mers  
810 found in only one of the two grandparents, while the second, more prominent peak  
811 represents those found in both.



812

813 **Figure S4. 21-mer coverage from whole-genome resequencing can be used to**  
814 **refine mapping intervals.** For each population, the upper panel displays the beta-  
815 binomial modeled allele frequency estimates (blue) and their 95% confidence intervals  
816 (grey) as described in the legend for Figure 2. In the lower panel, the coverage of 21-  
817 mers unique to only one of the two grandparents (coverage < 25x) is plotted in 1 Mb  
818 sliding windows (50 kb steps). Coverage decreases in the candidate regions. Intervals  
819 (grey box) are defined by merging windows with values within 1x coverage of the  
820 minimal window in each population. No candidate region was defined for POP064 as  
821 coverage decrease coincides with the centromere, not the distorted region.

822

823 **Figure S5. Increasing the number of analyzed segregants can be used to refine**  
824 **mapping intervals.** Bulked segregant analysis was performed for grandparental  
825 accessions that repeatedly contributed distorted loci (Star-8 [Figure 6C], ICE63 [shown  
826 here], and ICE49). Sequencing reads were combined for populations exhibiting  
827 distortion or not exhibiting distortion when crossed to the focal grandparent. An average  
828 of over 800x coverage was achieved at sites segregating between the focal accessions  
829 and all other members in the bulk. A candidate interval (grey box) was obtained by  
830 merging all segregating positions within 5% of the maximal allele frequency. Data for  
831 ICE49 not shown, as there were too few segregating sites.

832

Figure 1

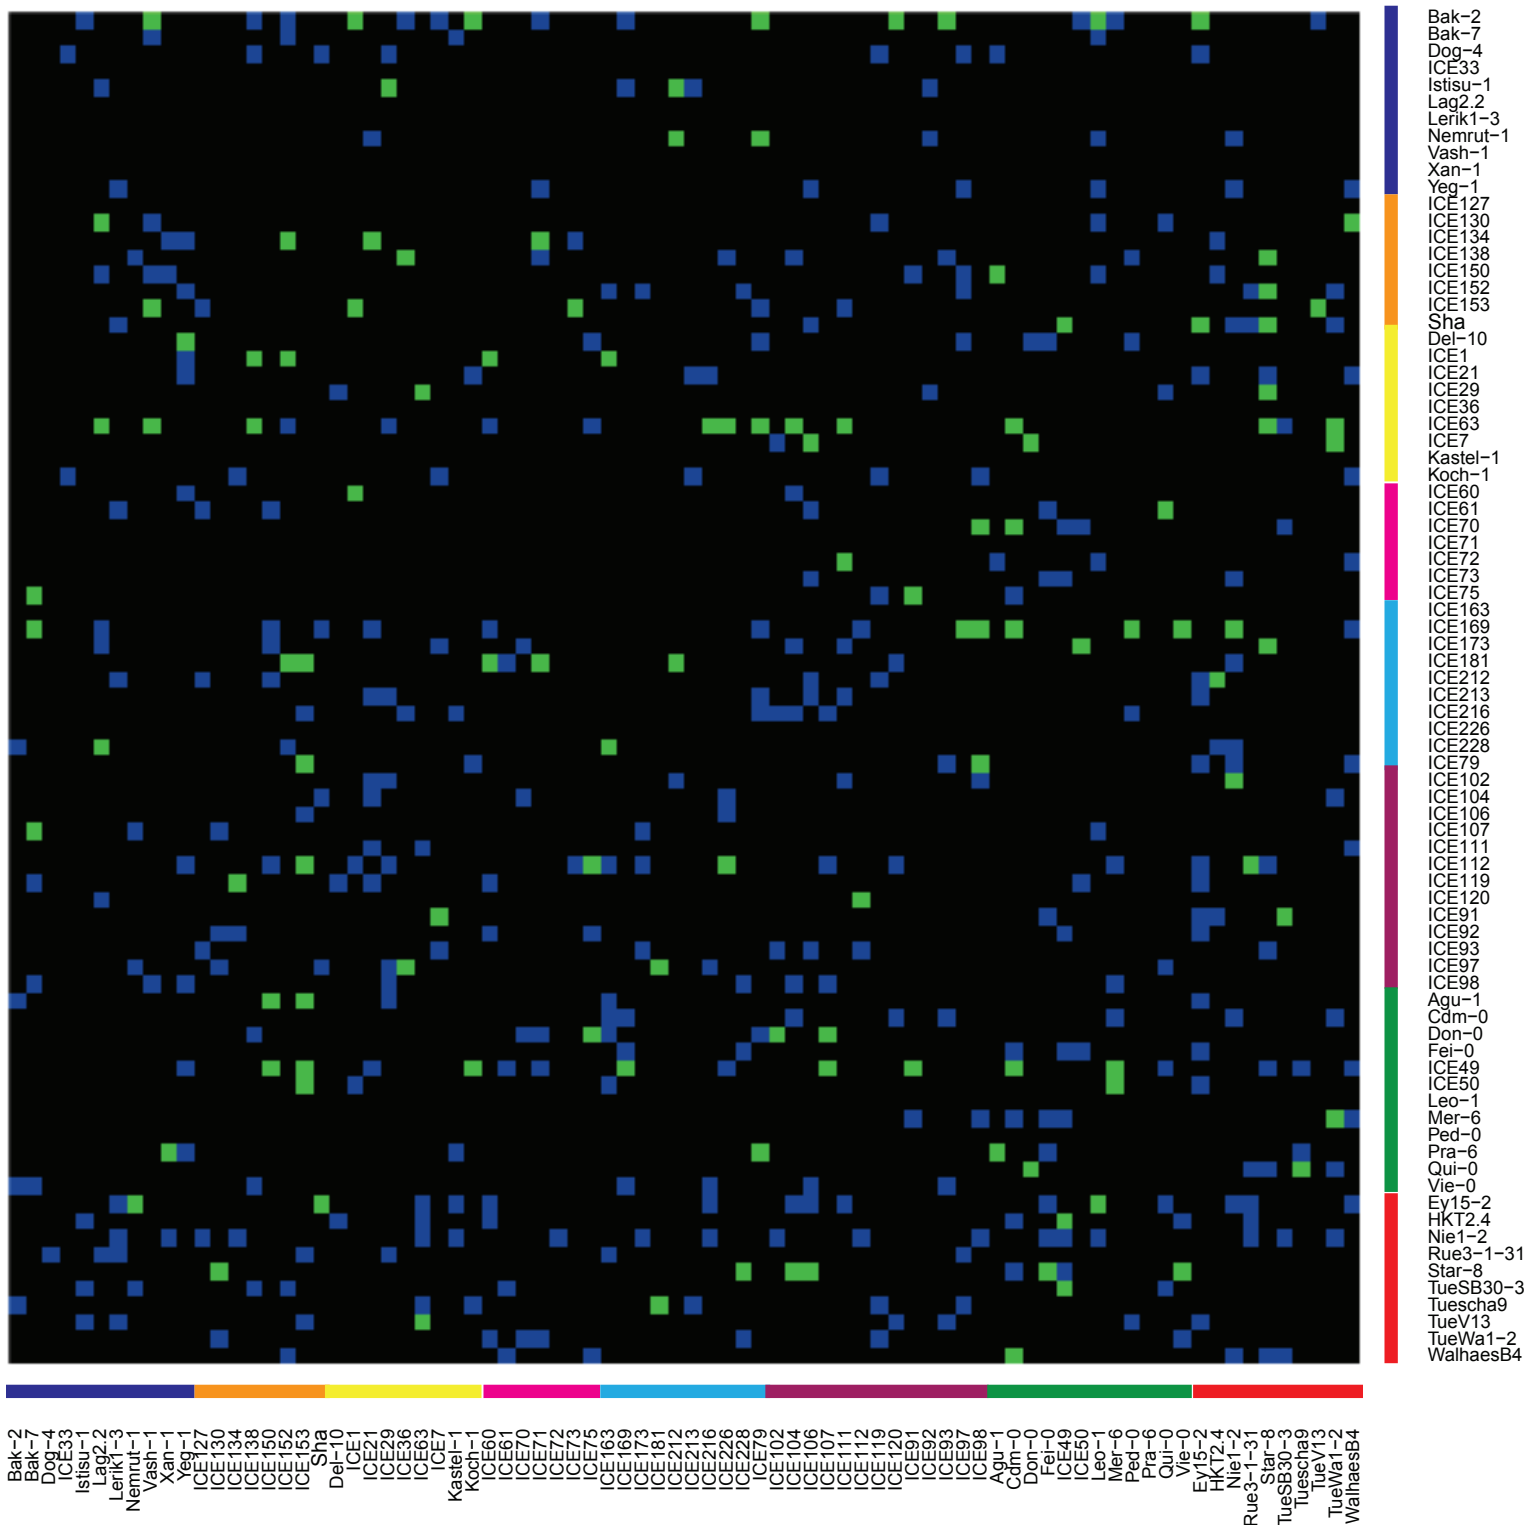

- Caucasus
- Central Asia
- Eastern Europe
- Russia
- South Tyrol
- Southern Italy
- Spain / North Africa
- Swabia

**Figure 2**

POP035: ICE63 x Vash-1

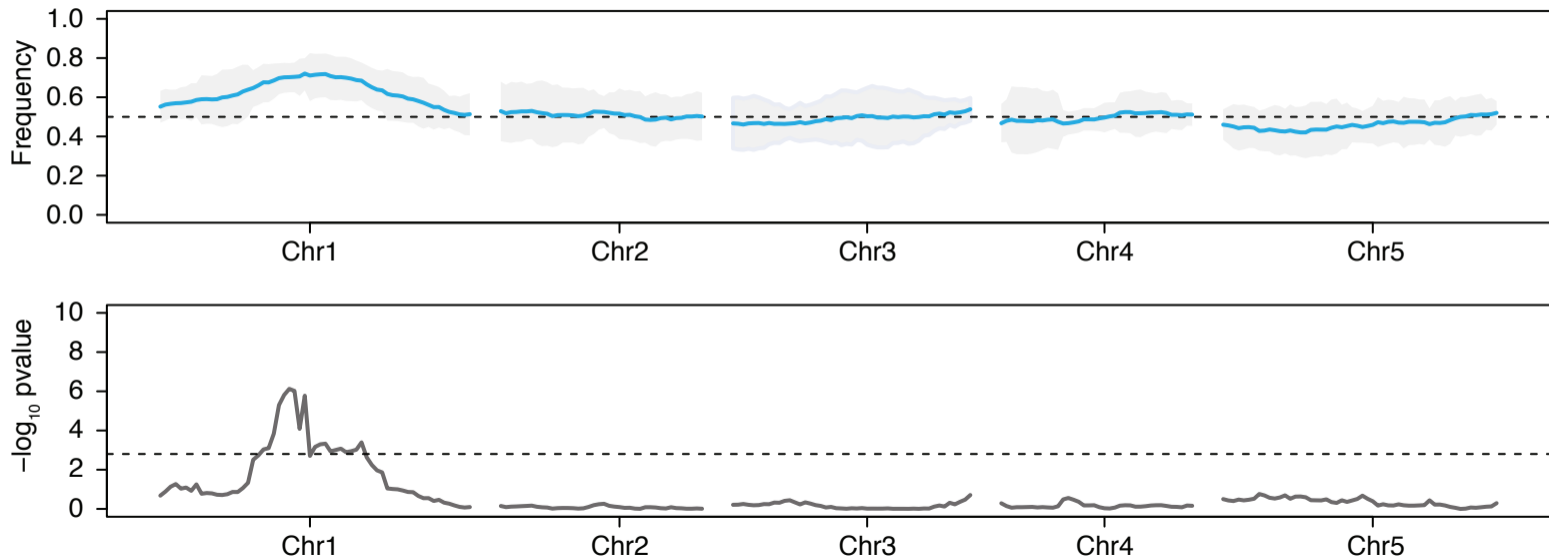

**Figure 3**

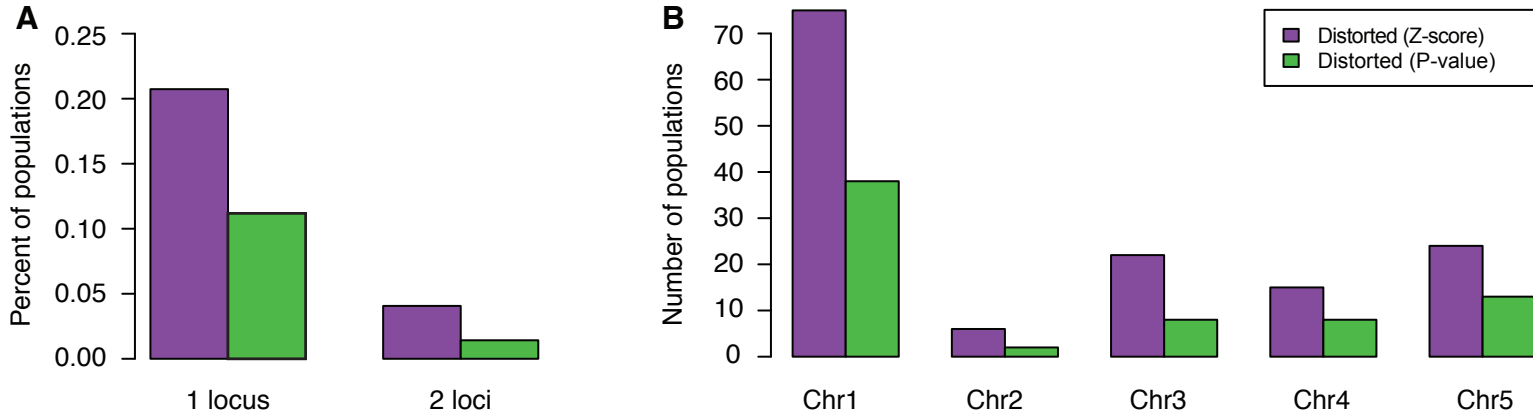

**Figure 4****A**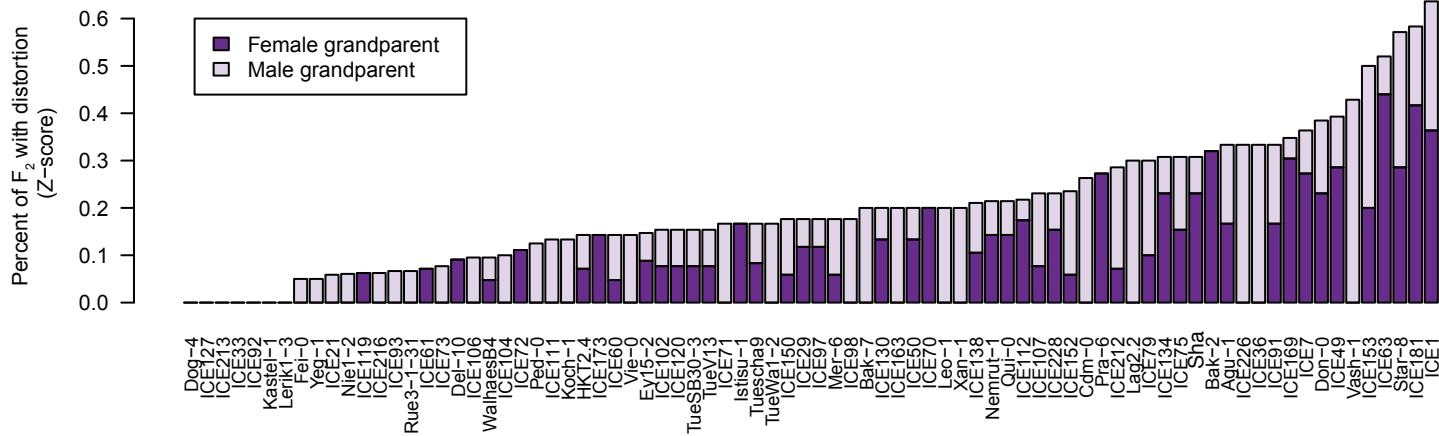**B**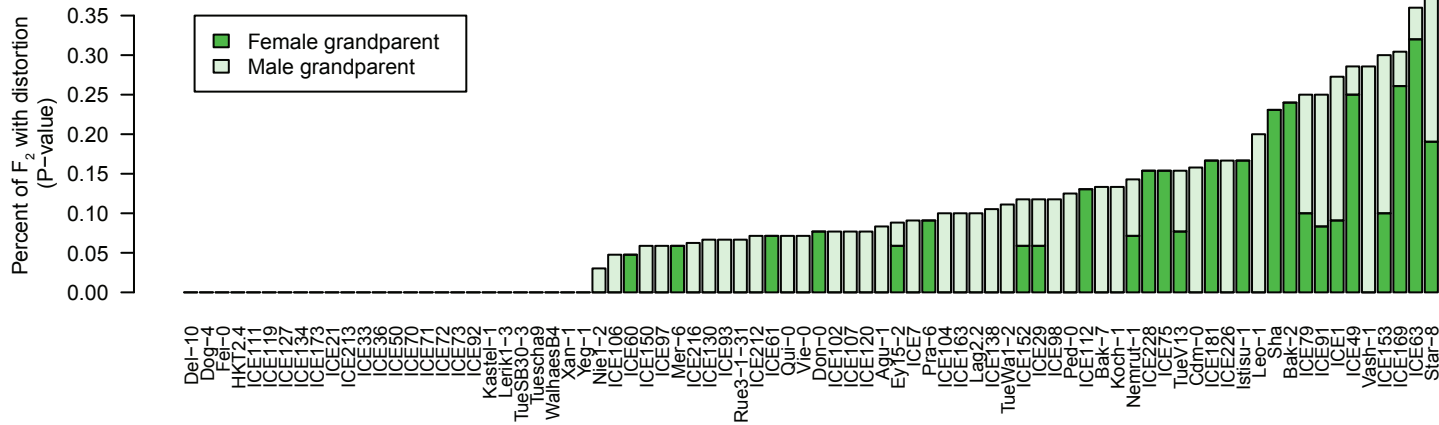

**Figure 5**

**A**

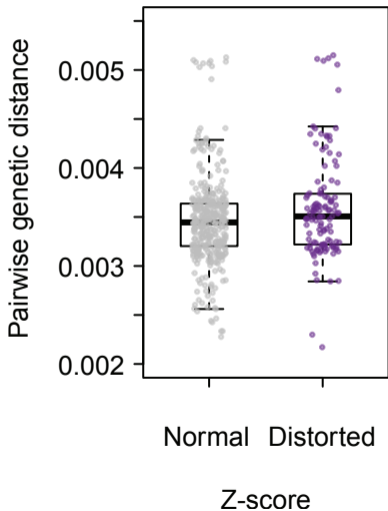

**B**

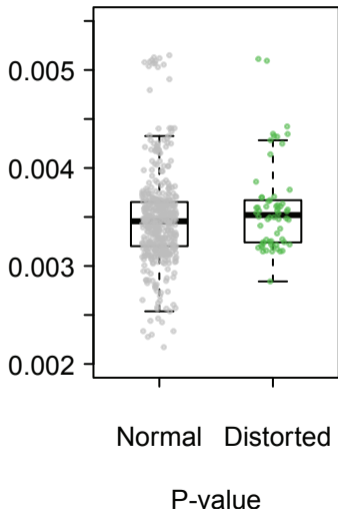

**Figure 6**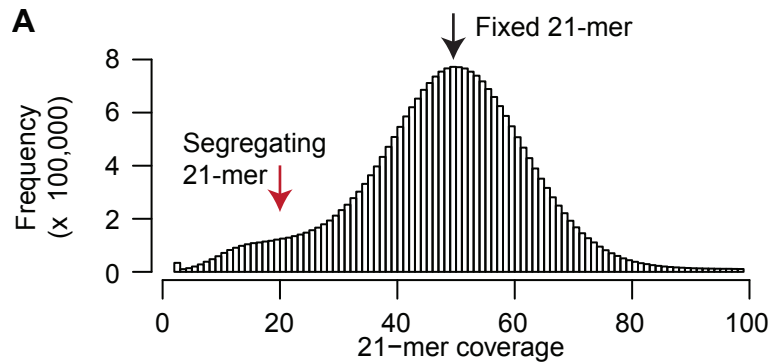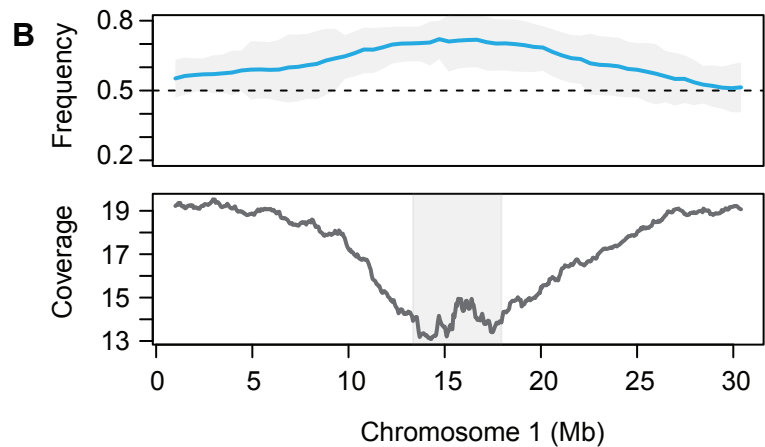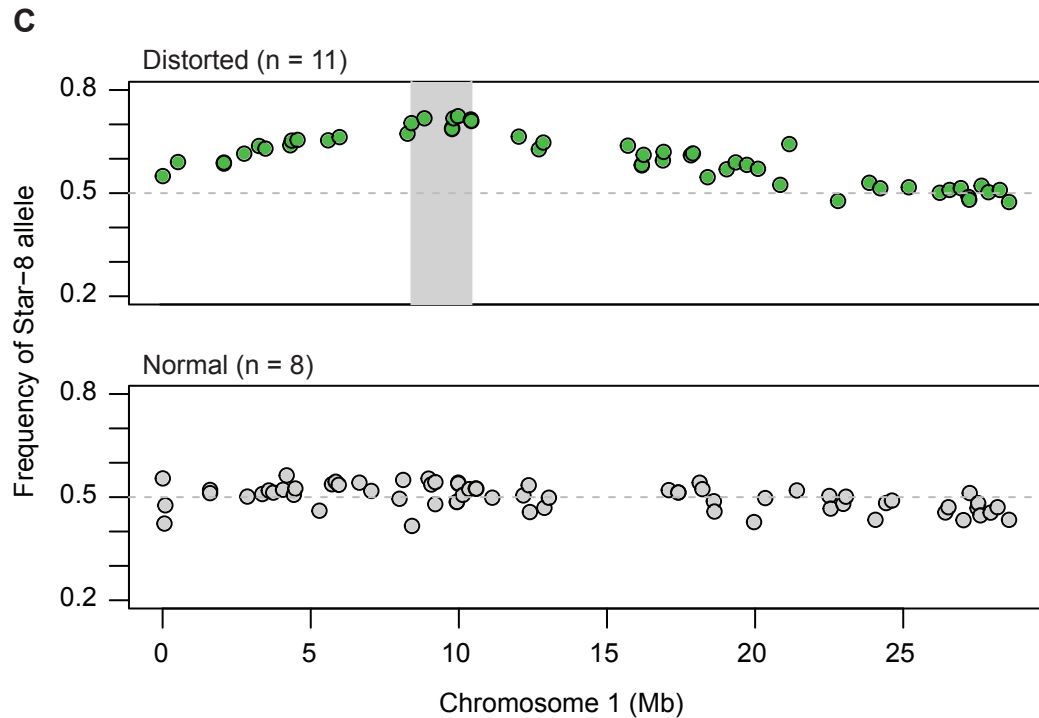

**Figure S1**

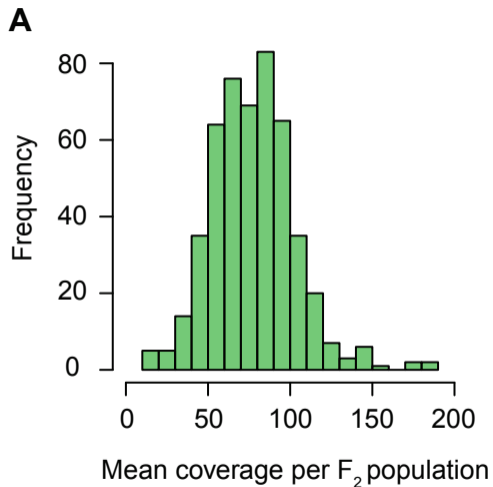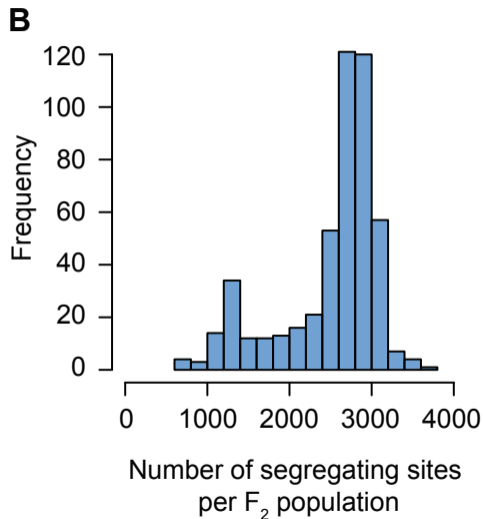



Figure S2

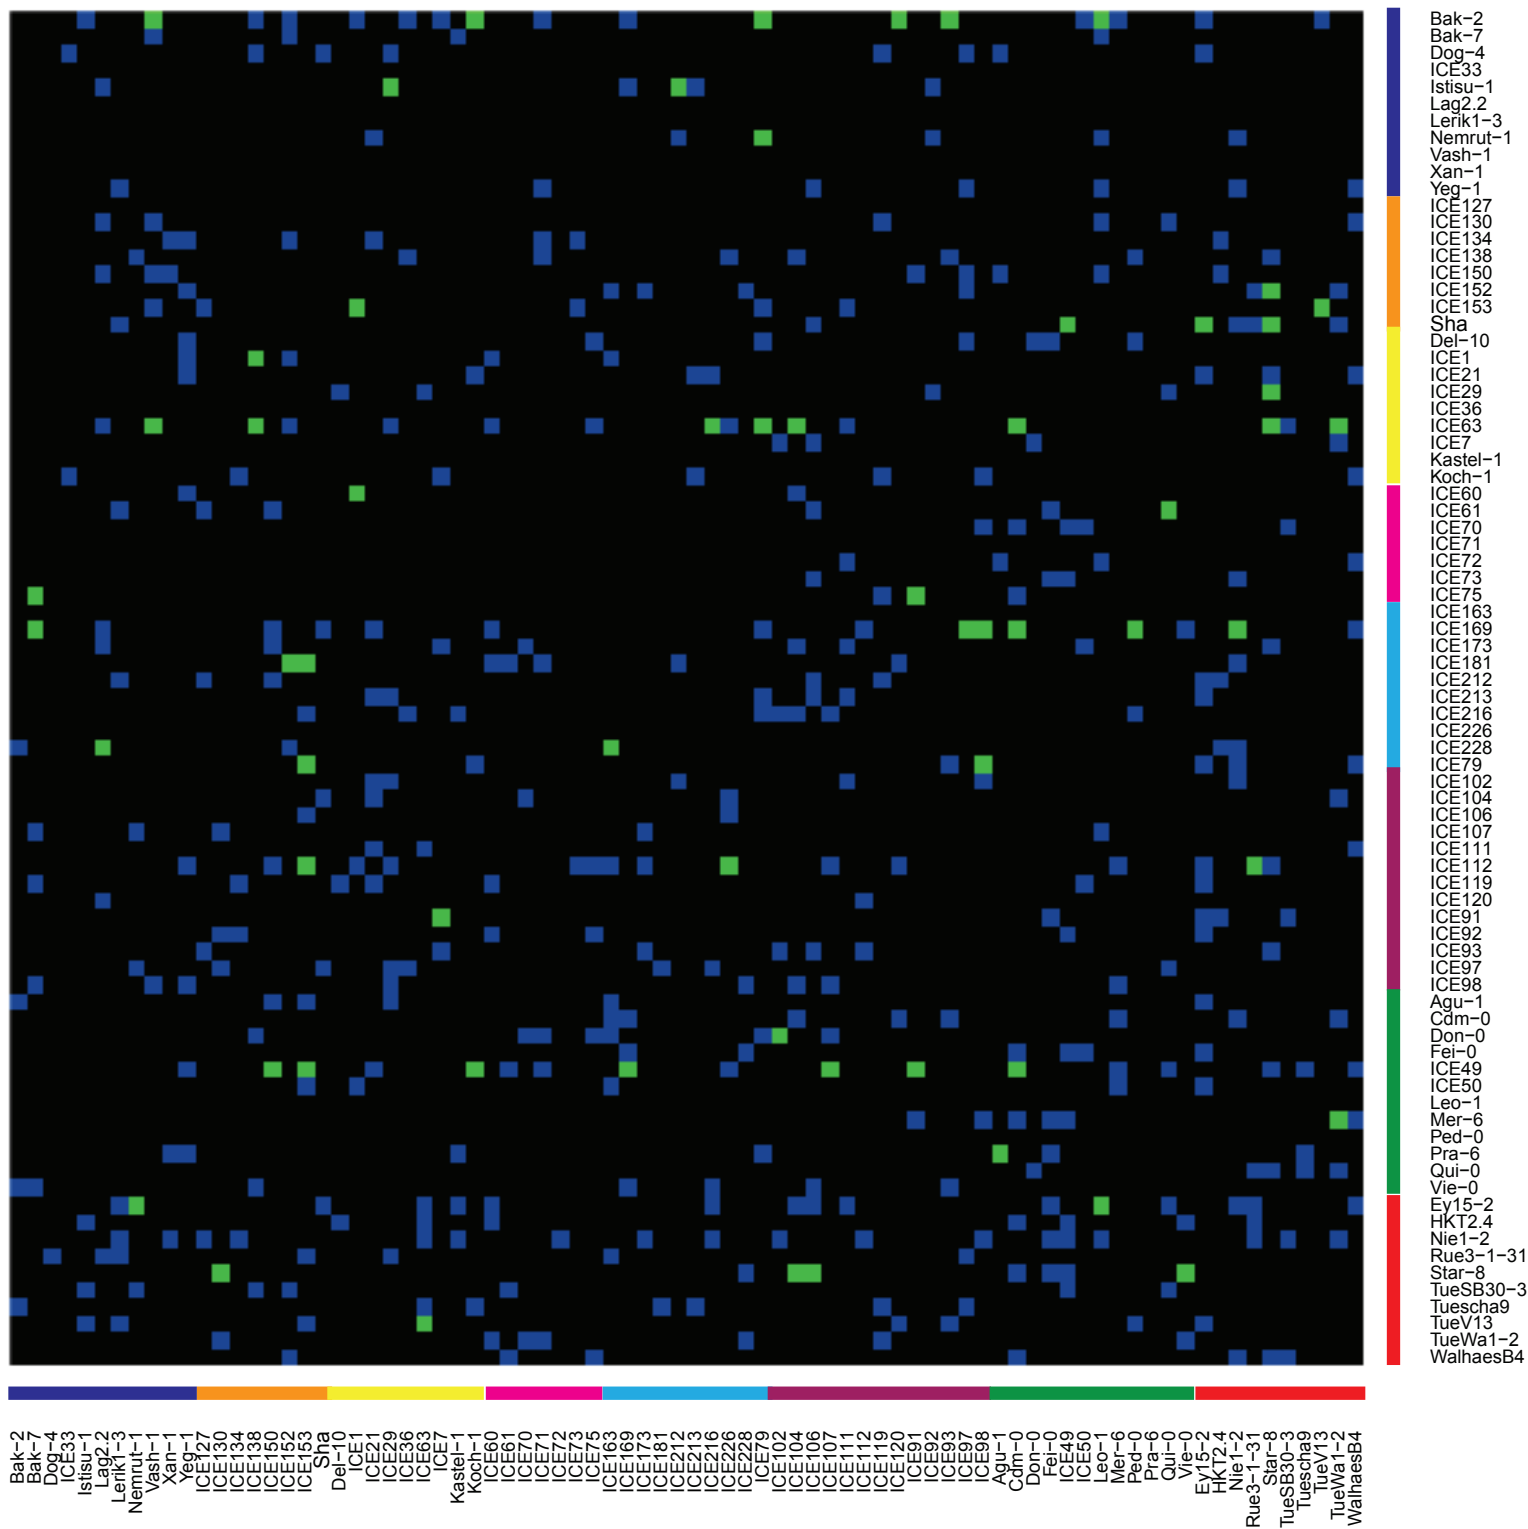

- |                                                       |                                                             |
|-------------------------------------------------------|-------------------------------------------------------------|
| <span style="color: #191970;">■</span> Caucasus       | <span style="color: #00BFFF;">■</span> South Tyrol          |
| <span style="color: #FF8C00;">■</span> Central Asia   | <span style="color: #800080;">■</span> Southern Italy       |
| <span style="color: #FFFF00;">■</span> Eastern Europe | <span style="color: #008000;">■</span> Spain / North Africa |
| <span style="color: #FF00FF;">■</span> Russia         | <span style="color: #FF0000;">■</span> Swabia               |

**Figure S3**

POP007

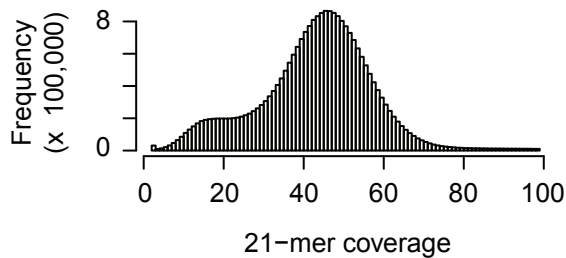

POP026

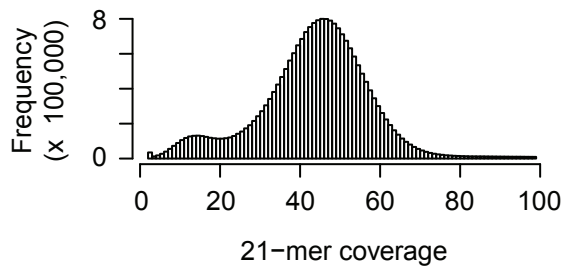

POP035

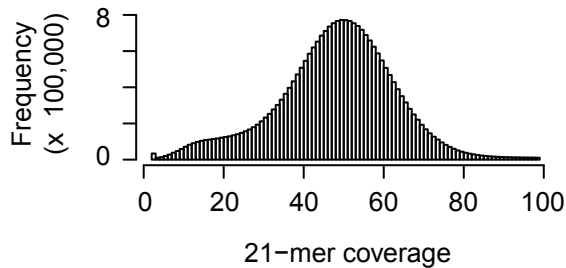

POP063

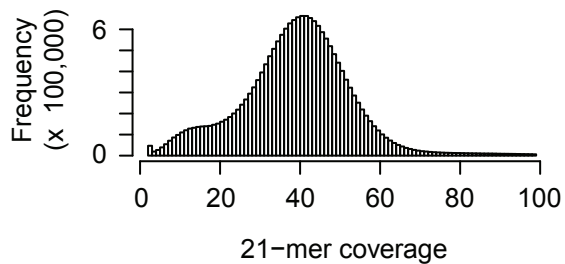

POP064

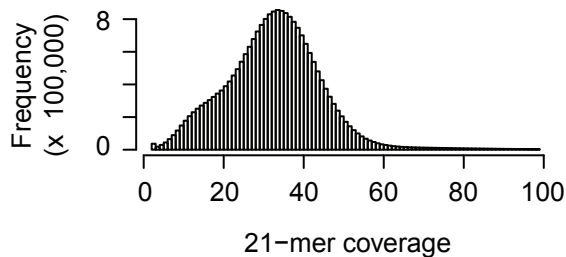

POP100

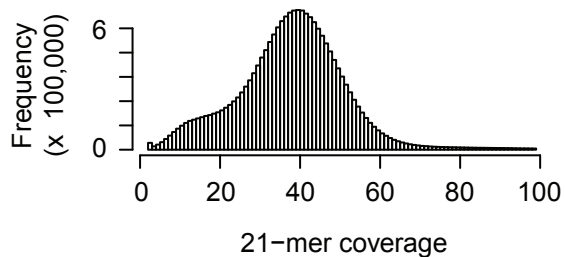

**Figure S4**

POP007: ICE49 x ICE153

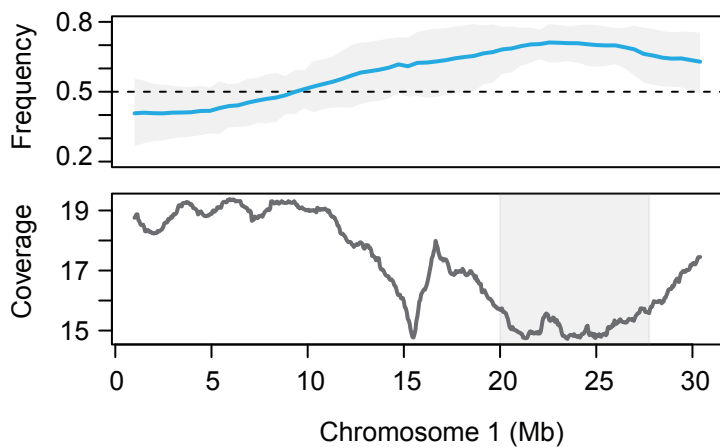

POP063: ICE169 x Bak-7

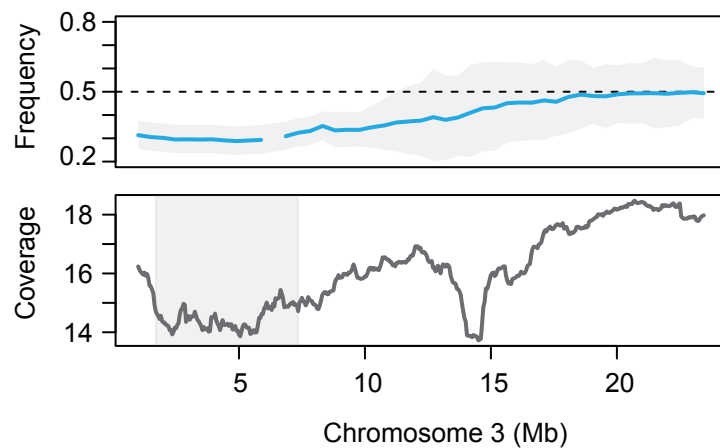

POP026: ICE63 x ICE216

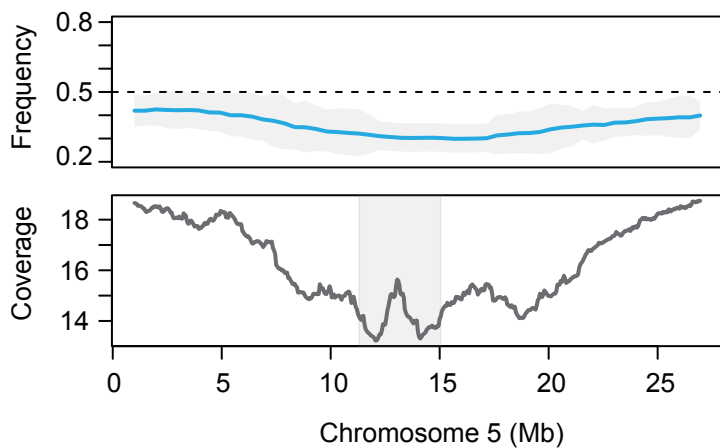

POP064: ICE169 x Cdm-0

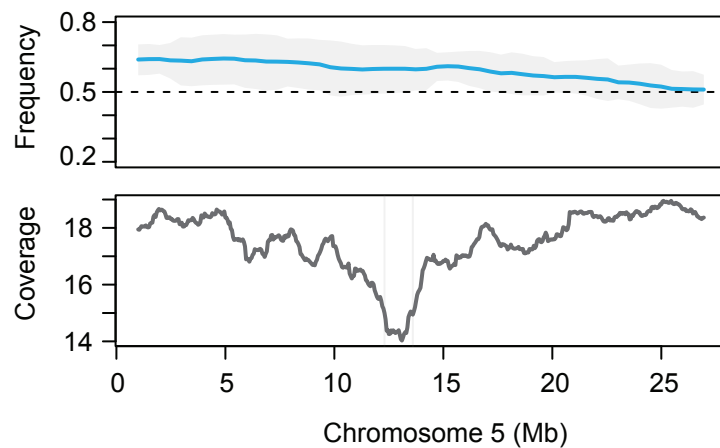

POP035: ICE63 x Vash-1

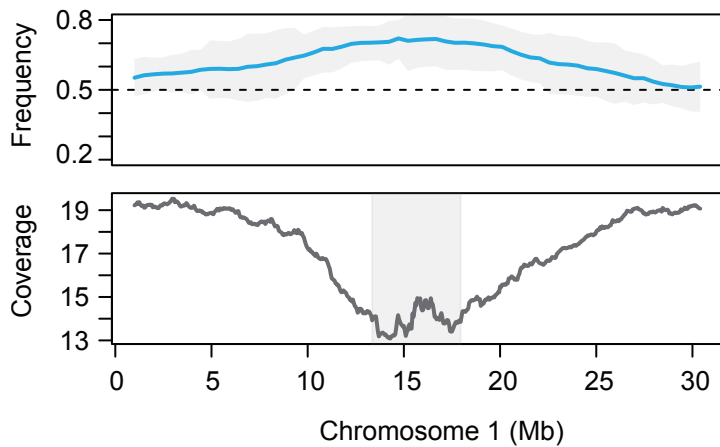

POP100: Ey15.2 x Leo-1

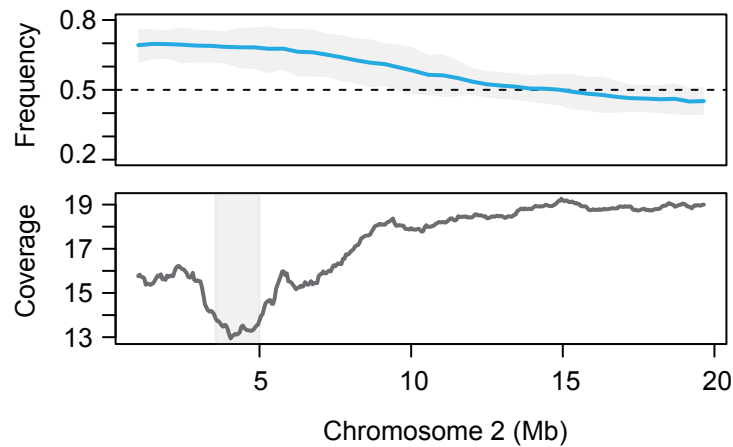

**Figure S5**

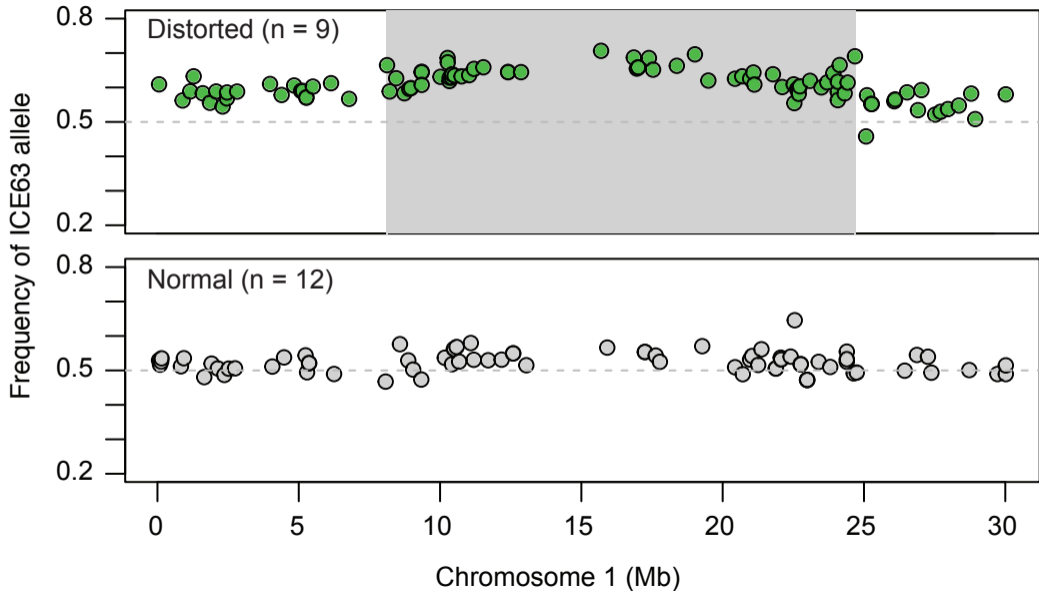

Source: http://biorxiv.org/content/10.1101/158527v1.full.pdf
